# Supplementary material
Source: publisher figshare collection journal article supplement (https://acs.figshare.com/ndownloader/files/5935227)
Supplement: Supplementary file 1 [file 5935227]

 
data_II 
 
_audit_creation_method            SHELXL-97 
_chemical_name_systematic 
; 
 ? 
; 
_chemical_name_common             ? 
_chemical_melting_point           ? 
_chemical_formula_moiety          'C42 H25 N O4 S' 
_chemical_formula_sum 
 'C42 H25 N O4 S' 
_chemical_formula_weight          639.69 
 
loop_ 
 _atom_type_symbol 
 _atom_type_description 
 _atom_type_scat_dispersion_real 
 _atom_type_scat_dispersion_imag 
 _atom_type_scat_source 
 'C'  'C'   0.0033   0.0016 
 'International Tables Vol C Tables 4.2.6.8 and 6.1.1.4' 
 'H'  'H'   0.0000   0.0000 
 'International Tables Vol C Tables 4.2.6.8 and 6.1.1.4' 
 'N'  'N'   0.0061   0.0033 
 'International Tables Vol C Tables 4.2.6.8 and 6.1.1.4' 
 'O'  'O'   0.0106   0.0060 
 'International Tables Vol C Tables 4.2.6.8 and 6.1.1.4' 
 'S'  'S'   0.1246   0.1234 
 'International Tables Vol C Tables 4.2.6.8 and 6.1.1.4' 
 
_symmetry_cell_setting            Orthorhombic 
_symmetry_space_group_name_H-M    'P bca'
_symmetry_space_goup_name_Hall    '-p 2ac 2ab' 
 
loop_ 
 _symmetry_equiv_pos_as_xyz 
 'x, y, z' 
 'x+1/2, -y+1/2, -z' 
 '-x, y+1/2, -z+1/2' 
 '-x+1/2, -y, z+1/2' 
 '-x, -y, -z' 
 '-x-1/2, y-1/2, z' 
 'x, -y-1/2, z-1/2' 
 'x-1/2, y, -z-1/2' 
 
_cell_length_a                    23.3663(14) 
_cell_length_b                    15.2047(10) 
_cell_length_c                    34.530(3) 
_cell_angle_alpha                 90.00 
_cell_angle_beta                  90.00 
_cell_angle_gamma                 90.00 
_cell_volume                      12267.6(14) 
_cell_formula_units_Z             16 
_cell_measurement_temperature     296(2) 
_cell_measurement_reflns_used     10729 
_cell_measurement_theta_min       2.38
_cell_measurement_theta_max       24.96
 
_exptl_crystal_description        block 
_exptl_crystal_colour             colourless
_exptl_crystal_size_max           0.35
_exptl_crystal_size_mid           0.30
_exptl_crystal_size_min           0.25
_exptl_crystal_density_meas       ? 
_exptl_crystal_density_diffrn     1.385 
_exptl_crystal_density_method     'not measured' 
_exptl_crystal_F_000              5312 
_exptl_absorpt_coefficient_mu     0.154 
_exptl_absorpt_correction_type    multi-scan 
_exptl_absorpt_correction_T_min   0.948
_exptl_absorpt_correction_T_max   0.962
_exptl_absorpt_process_details    'SADABS (Bruker, 2008)'
 
_exptl_special_details 
; 
 ? 
; 
 
_diffrn_ambient_temperature       296(2) 
_diffrn_radiation_wavelength      0.71073 
_diffrn_radiation_type            MoK\a 
_diffrn_radiation_source          'fine-focus sealed tube' 
_diffrn_radiation_monochromator   graphite 
_diffrn_measurement_device_type   
'Bruker Kappa ApexII CCD diffractometer' 
_diffrn_measurement_method        '\w & \f scans'
_diffrn_detector_area_resol_mean  ? 
_diffrn_standards_number          ? 
_diffrn_standards_interval_count  ? 
_diffrn_standards_interval_time   ? 
_diffrn_standards_decay_%         ? 
_diffrn_reflns_number             179772 
_diffrn_reflns_av_R_equivalents   0.0528 
_diffrn_reflns_av_sigmaI/netI     0.0259 
_diffrn_reflns_limit_h_min        -27 
_diffrn_reflns_limit_h_max        27 
_diffrn_reflns_limit_k_min        -18 
_diffrn_reflns_limit_k_max        18 
_diffrn_reflns_limit_l_min        -40 
_diffrn_reflns_limit_l_max        40 
_diffrn_reflns_theta_min          2.38 
_diffrn_reflns_theta_max          24.96 
_reflns_number_total              10729 
_reflns_number_gt                 7068 
_reflns_threshold_expression      >2sigma(I) 
 
_computing_data_collection        ? 
_computing_cell_refinement        ? 
_computing_data_reduction         ? 
_computing_structure_solution     'SHELXS-97 (Sheldrick, 1990)' 
_computing_structure_refinement   'SHELXL-97 (Sheldrick, 1997)' 
_computing_molecular_graphics     ? 
_computing_publication_material   ? 
 
_refine_special_details 
; 
 Refinement of F^2^ against ALL reflections.  The weighted R-factor wR and 
 goodness of fit S are based on F^2^, conventional R-factors R are based 
 on F, with F set to zero for negative F^2^. The threshold expression of 
 F^2^ > 2sigma(F^2^) is used only for calculating R-factors(gt) etc. and is 
 not relevant to the choice of reflections for refinement.  R-factors based 
 on F^2^ are statistically about twice as large as those based on F, and R- 
 factors based on ALL data will be even larger. 
; 
 
_refine_ls_structure_factor_coef  Fsqd  
_refine_ls_matrix_type            full 
_refine_ls_weighting_scheme       calc  
_refine_ls_weighting_details 
 'calc w=1/[\s^2^(Fo^2^)+(0.0121P)^2^+20.0133P] where P=(Fo^2^+2Fc^2^)/3' 
_atom_sites_solution_primary      direct 
_atom_sites_solution_secondary    difmap 
_atom_sites_solution_hydrogens    geom 
_refine_ls_hydrogen_treatment     constr
_refine_ls_extinction_method      none 
_refine_ls_extinction_coef        ? 
_refine_ls_number_reflns          10729 
_refine_ls_number_parameters      923 
_refine_ls_number_restraints      140 
_refine_ls_R_factor_all           0.1140 
_refine_ls_R_factor_gt            0.0618 
_refine_ls_wR_factor_ref          0.1427 
_refine_ls_wR_factor_gt           0.1124 
_refine_ls_goodness_of_fit_ref    1.228 
_refine_ls_restrained_S_all       1.223 
_refine_ls_shift/su_max           0.003 
_refine_ls_shift/su_mean          0.000 
_iucr_refine_instructions_details
;
TITL GIB in Pbca
CELL  0.71073  23.3663  15.2047  34.5296   90.000   90.000   90.000
ZERR    16.00   0.0014   0.0010   0.0026    0.000    0.000    0.000
LATT   1
SYMM  1/2 + X, 1/2 - Y, - Z
SYMM  - X, 1/2 + Y, 1/2 - Z
SYMM  1/2 - X, - Y, 1/2 + Z
SFAC  C    H    N    O    S
UNIT  672  400  16   64   16
MERG   2
OMIT    -2.00  50.00
OMIT     2   1   0
OMIT     2   1   1
OMIT     2   0   2
OMIT     2   1   2
OMIT     0   0   4
OMIT     1   0   2
OMIT     0   0   2
OMIT     2   0   0
SADI  0.01 N1 S1 N1 S1'
SADI  0.01 S1 O2 S1' O2'
SADI  0.01 S1 O3 S1' O3'
SADI  0.01 S1 C13 S1' C13'
SIMU  0.02 S1 > C18
DELU  0.01 S1 > C18
SIMU  0.02 S1' > C18'
DELU  0.01 S1' > C18'
FMAP   2
PLAN   30
ACTA
BOND   $H
CONF
L.S.   8
TEMP    23.00
WGHT    0.012100   20.013300
FVAR       0.04608   0.67403
C8    1    0.400958    0.508475    0.787240    11.00000    0.03843    0.06424 =
         0.05128    0.00977    0.01193    0.00643
C9    1    0.419884    0.442558    0.763081    11.00000    0.03988    0.07720 =
         0.07189    0.00786    0.01851    0.00435
AFIX  43
H9    2    0.458193    0.436064    0.756357    11.00000   -1.20000
AFIX   0
C10   1    0.378438    0.387794    0.749825    11.00000    0.05617    0.05936 =
         0.05786    0.00460    0.01514    0.01465
C19   1    0.336080    0.281131    0.717398    11.00000    0.07250    0.04990 =
         0.05382    0.00863    0.00803    0.01279
C20   1    0.327678    0.211903    0.692399    11.00000    0.09164    0.05960 =
         0.07075    0.00283    0.00772    0.01793
AFIX  43
H20   2    0.357844    0.186067    0.679010    11.00000   -1.20000
AFIX   0
C21   1    0.272257    0.182959    0.688274    11.00000    0.10773    0.05071 =
         0.06492   -0.00017   -0.00846    0.02066
AFIX  43
H21   2    0.264534    0.136570    0.671516    11.00000   -1.20000
AFIX   0
C22   1    0.227333    0.221820    0.708742    11.00000    0.08128    0.06000 =
         0.07017    0.00378   -0.01536    0.00924
AFIX  43
H22   2    0.190356    0.200210    0.705784    11.00000   -1.20000
AFIX   0
C23   1    0.237107    0.292128    0.733395    11.00000    0.06607    0.05633 =
         0.05438    0.00490   -0.00343    0.01236
AFIX  43
H23   2    0.206941    0.317724    0.746873    11.00000   -1.20000
AFIX   0
C24   1    0.292563    0.324041    0.737772    11.00000    0.05674    0.05463 =
         0.04583    0.01109    0.00227    0.00884
C11   1    0.320535    0.394446    0.759102    11.00000    0.04867    0.05128 =
         0.04271    0.00836    0.00217    0.00993
C12   1    0.301883    0.461768    0.783921    11.00000    0.04005    0.05164 =
         0.03862    0.01199    0.00318    0.00590
C7    1    0.342914    0.520680    0.798600    11.00000    0.03401    0.05392 =
         0.04321    0.01038    0.00324    0.00320
C6    1    0.342557    0.594963    0.825990    11.00000    0.03774    0.05034 =
         0.04109    0.01258    0.00192    0.00130
C5    1    0.300779    0.637301    0.849131    11.00000    0.03640    0.04632 =
         0.04009    0.01048    0.00348   -0.00121
C4    1    0.319641    0.701981    0.875194    11.00000    0.03791    0.04812 =
         0.04539    0.01061   -0.00175    0.00161
C42   1    0.291967    0.756144    0.904549    11.00000    0.04721    0.04395 =
         0.05084    0.01129   -0.00386    0.00326
C41   1    0.237212    0.764246    0.919867    11.00000    0.04947    0.05568 =
         0.06533    0.00147   -0.00013    0.00617
AFIX  43
H41   2    0.206920    0.731954    0.909718    11.00000   -1.20000
AFIX   0
C40   1    0.228719    0.821298    0.950502    11.00000    0.06641    0.06200 =
         0.06848   -0.00064    0.00137    0.01508
AFIX  43
H40   2    0.192237    0.826406    0.961033    11.00000   -1.20000
AFIX   0
C39   1    0.272471    0.870835    0.965955    11.00000    0.08399    0.06375 =
         0.06696   -0.00246   -0.00949    0.02087
AFIX  43
H39   2    0.264974    0.908229    0.986656    11.00000   -1.20000
AFIX   0
C38   1    0.326984    0.865863    0.951268    11.00000    0.08190    0.04753 =
         0.06242    0.00137   -0.01922    0.00152
AFIX  43
H38   2    0.356757    0.899865    0.961032    11.00000   -1.20000
AFIX   0
C37   1    0.334990    0.807465    0.921178    11.00000    0.05149    0.04890 =
         0.05301    0.01254   -0.00749    0.00064
C3    1    0.377383    0.726132    0.876725    11.00000    0.04405    0.05813 =
         0.04548    0.01309   -0.00565   -0.00527
C2    1    0.419014    0.688706    0.854597    11.00000    0.03579    0.06308 =
         0.05585    0.01381   -0.00161   -0.00691
AFIX  43
H2    2    0.457214    0.705478    0.856218    11.00000   -1.20000
AFIX   0
C1    1    0.400366    0.624276    0.829680    11.00000    0.03367    0.05687 =
         0.05061    0.01269    0.00413   -0.00292
C25   1    0.238612    0.464348    0.789609    11.00000    0.03656    0.04259 =
         0.04395    0.00186    0.00009   -0.00046
C26   1    0.205944    0.515003    0.765205    11.00000    0.04450    0.05895 =
         0.07167    0.02165   -0.00850    0.00076
AFIX  43
H26   2    0.223837    0.553792    0.748262    11.00000   -1.20000
AFIX   0
C27   1    0.147094    0.509303    0.765408    11.00000    0.04811    0.07005 =
         0.09533    0.01276   -0.01996    0.00240
AFIX  43
H27   2    0.125513    0.544128    0.748765    11.00000   -1.20000
AFIX   0
C28   1    0.120591    0.452287    0.790156    11.00000    0.03851    0.07336 =
         0.09382   -0.00937   -0.00119   -0.00784
AFIX  43
H28   2    0.080898    0.447772    0.790238    11.00000   -1.20000
AFIX   0
C29   1    0.152304    0.402203    0.814643    11.00000    0.06025    0.06871 =
         0.07571    0.00360    0.01982   -0.01643
AFIX  43
H29   2    0.134025    0.363727    0.831536    11.00000   -1.20000
AFIX   0
C30   1    0.211394    0.407572    0.814830    11.00000    0.05124    0.05402 =
         0.05921    0.01098    0.00520   -0.00253
AFIX  43
H30   2    0.232663    0.373178    0.831827    11.00000   -1.20000
AFIX   0
C31   1    0.237190    0.624722    0.848610    11.00000    0.03396    0.05455 =
         0.04466   -0.00442    0.00417    0.00046
C32   1    0.204680    0.681626    0.826648    11.00000    0.04466    0.08616 =
         0.06343   -0.00142   -0.00479    0.00594
AFIX  43
H32   2    0.222379    0.719708    0.809305    11.00000   -1.20000
AFIX   0
C33   1    0.145627    0.682089    0.830410    11.00000    0.04786    0.11468 =
         0.08345   -0.01527   -0.01337    0.02387
AFIX  43
H33   2    0.123703    0.720090    0.815400    11.00000   -1.20000
AFIX   0
C34   1    0.119454    0.626527    0.856262    11.00000    0.03331    0.12580 =
         0.09858   -0.04299    0.00852   -0.00168
AFIX  43
H34   2    0.079873    0.627459    0.859062    11.00000   -1.20000
AFIX   0
C35   1    0.151594    0.570043    0.877799    11.00000    0.04902    0.08313 =
         0.09773   -0.01748    0.02698   -0.01402
AFIX  43
H35   2    0.133642    0.531675    0.894898    11.00000   -1.20000
AFIX   0
C36   1    0.210503    0.569000    0.874574    11.00000    0.04399    0.05997 =
         0.07288   -0.00053    0.01352   -0.00431
AFIX  43
H36   2    0.232106    0.530999    0.889796    11.00000   -1.20000
AFIX   0
C8A   1    0.323363    0.652689    1.002739    11.00000    0.04356    0.03815 =
         0.04577    0.00726   -0.00680   -0.00447
C9A   1    0.303427    0.592144    0.976404    11.00000    0.04213    0.04801 =
         0.05443    0.00776   -0.00426   -0.00841
AFIX  43
H9A   2    0.265226    0.575228    0.975121    11.00000   -1.20000
AFIX   0
C10A  1    0.344238    0.559073    0.952392    11.00000    0.05537    0.03961 =
         0.04173    0.00496   -0.00973   -0.00820
C19A  1    0.385709    0.476208    0.908295    11.00000    0.05970    0.04305 =
         0.04362    0.00707   -0.00274   -0.00218
C20A  1    0.393635    0.412553    0.880511    11.00000    0.07836    0.05113 =
         0.05160   -0.00006   -0.00609   -0.00580
AFIX  43
H20A  2    0.363356    0.379387    0.870904    11.00000   -1.20000
AFIX   0
C21A  1    0.448838    0.400690    0.867731    11.00000    0.08188    0.06004 =
         0.05797   -0.00236    0.00571    0.00258
AFIX  43
H21A  2    0.456349    0.358350    0.848970    11.00000   -1.20000
AFIX   0
C22A  1    0.493226    0.450456    0.882242    11.00000    0.06724    0.06191 =
         0.06004   -0.00259    0.00851    0.00288
AFIX  43
H22A  2    0.530103    0.440858    0.873034    11.00000   -1.20000
AFIX   0
C23A  1    0.484335    0.514588    0.910265    11.00000    0.06207    0.05341 =
         0.04899   -0.00143   -0.00365   -0.00370
AFIX  43
H23A  2    0.514715    0.547957    0.919585    11.00000   -1.20000
AFIX   0
C24A  1    0.429159    0.527899    0.924098    11.00000    0.05589    0.03934 =
         0.04118    0.00700   -0.00159    0.00012
C11A  1    0.402002    0.583840    0.952850    11.00000    0.04818    0.03644 =
         0.03851    0.00521   -0.00226   -0.00477
C12A  1    0.421078    0.648191    0.978844    11.00000    0.04568    0.03412 =
         0.04093    0.00615   -0.00645   -0.00224
C7A   1    0.380315    0.686108    1.004167    11.00000    0.04142    0.03263 =
         0.04201    0.00608   -0.00573    0.00023
C6A   1    0.380242    0.757083    1.033222    11.00000    0.04429    0.03647 =
         0.04018    0.00441   -0.00666   -0.00148
C5A   1    0.420093    0.819382    1.046592    11.00000    0.04240    0.04366 =
         0.03910    0.00263   -0.00517    0.00079
C4A   1    0.401224    0.882720    1.073145    11.00000    0.04795    0.04629 =
         0.04396    0.00110   -0.00648   -0.00080
C42A  1    0.428424    0.955656    1.093311    11.00000    0.05632    0.04647 =
         0.04528   -0.00063   -0.00514   -0.00093
C41A  1    0.482998    0.992818    1.094927    11.00000    0.06603    0.05279 =
         0.05207   -0.00074   -0.00452   -0.00680
AFIX  43
H41A  2    0.512690    0.970428    1.079944    11.00000   -1.20000
AFIX   0
C40A  1    0.491938    1.063710    1.119317    11.00000    0.07489    0.06180 =
         0.06437   -0.00745   -0.00159   -0.01463
AFIX  43
H40A  2    0.528297    1.088386    1.120727    11.00000   -1.20000
AFIX   0
C39A  1    0.448560    1.099016    1.141650    11.00000    0.09484    0.06440 =
         0.07127   -0.01771   -0.00552   -0.00849
AFIX  43
H39A  2    0.456110    1.146935    1.157589    11.00000   -1.20000
AFIX   0
C38A  1    0.394349    1.063947    1.140518    11.00000    0.08002    0.06499 =
         0.07262   -0.02551    0.00157    0.00616
AFIX  43
H38A  2    0.364770    1.086973    1.155416    11.00000   -1.20000
AFIX   0
C37A  1    0.385865    0.993178    1.116318    11.00000    0.06278    0.05341 =
         0.06467   -0.00717   -0.00455    0.00266
C3A   1    0.344671    0.882754    1.086328    11.00000    0.05427    0.05312 =
         0.05194   -0.00725   -0.00270    0.00486
C2A   1    0.304266    0.822949    1.074613    11.00000    0.04483    0.06083 =
         0.06326   -0.00383    0.00362    0.00222
AFIX  43
H2A   2    0.266783    0.823729    1.083663    11.00000   -1.20000
AFIX   0
C1A   1    0.323624    0.761954    1.048487    11.00000    0.04138    0.04949 =
         0.04739    0.00281   -0.00266    0.00203
C25A  1    0.484293    0.665870    0.976699    11.00000    0.04161    0.04162 =
         0.04251   -0.00421   -0.00088   -0.00340
C30A  1    0.507314    0.720493    0.948820    11.00000    0.04435    0.05249 =
         0.06239    0.01519   -0.00208   -0.00086
AFIX  43
H30A  2    0.483101    0.754824    0.933707    11.00000   -1.20000
AFIX   0
C29A  1    0.565739    0.724984    0.943007    11.00000    0.05346    0.06111 =
         0.06488    0.01182    0.00737   -0.00440
AFIX  43
H29A  2    0.580672    0.762653    0.924348    11.00000   -1.20000
AFIX   0
C28A  1    0.601738    0.673539    0.964916    11.00000    0.04327    0.05564 =
         0.06903   -0.00793    0.00295   -0.00055
AFIX  43
H28A  2    0.641072    0.675969    0.960947    11.00000   -1.20000
AFIX   0
C27A  1    0.579616    0.618835    0.992533    11.00000    0.04981    0.06552 =
         0.06436    0.00929   -0.01204    0.00276
AFIX  43
H27A  2    0.603998    0.584171    1.007371    11.00000   -1.20000
AFIX   0
C26A  1    0.521255    0.614790    0.998506    11.00000    0.05114    0.05638 =
         0.04910    0.01105   -0.00722   -0.00301
AFIX  43
H26A  2    0.506626    0.577369    1.017371    11.00000   -1.20000
AFIX   0
C31A  1    0.482159    0.825390    1.036195    11.00000    0.04477    0.04635 =
         0.04426   -0.00619   -0.00234   -0.00769
C36A  1    0.501743    0.883356    1.008365    11.00000    0.06562    0.07497 =
         0.05429    0.00455    0.00209   -0.01688
AFIX  43
H36A  2    0.475820    0.913064    0.992664    11.00000   -1.20000
AFIX   0
C35A  1    0.560096    0.897293    1.003819    11.00000    0.08135    0.09043 =
         0.07542   -0.01218    0.02369   -0.03862
AFIX  43
H35A  2    0.573030    0.935949    0.984870    11.00000   -1.20000
AFIX   0
C34A  1    0.598594    0.854894    1.026848    11.00000    0.04992    0.10439 =
         0.09590   -0.04274    0.01349   -0.02131
AFIX  43
H34A  2    0.637584    0.865470    1.024094    11.00000   -1.20000
AFIX   0
C33A  1    0.579472    0.797152    1.053805    11.00000    0.04854    0.08683 =
         0.10151   -0.02308   -0.01402    0.00193
AFIX  43
H33A  2    0.605658    0.767031    1.069150    11.00000   -1.20000
AFIX   0
C32A  1    0.521683    0.782472    1.058782    11.00000    0.05050    0.05341 =
         0.06971   -0.00153   -0.00727   -0.00108
AFIX  43
H32A  2    0.509349    0.743101    1.077629    11.00000   -1.20000
AFIX   0
C13A  1    0.283309    0.585751    1.092520    11.00000    0.04249    0.04866 =
         0.05690   -0.00073    0.00511   -0.00570
C18A  1    0.315554    0.514046    1.082044    11.00000    0.07818    0.06527 =
         0.05087   -0.00315    0.00263    0.01369
AFIX  43
H80   2    0.314431    0.493058    1.056757    11.00000   -1.20000
AFIX   0
C17A  1    0.349427    0.473652    1.109187    11.00000    0.08945    0.06484 =
         0.07472    0.00326    0.00825    0.02395
AFIX  43
H81   2    0.371582    0.425334    1.102262    11.00000   -1.20000
AFIX   0
C16A  1    0.350669    0.504354    1.146460    11.00000    0.08064    0.06260 =
         0.06457    0.00944   -0.00666    0.00220
AFIX  43
H82   2    0.373806    0.476832    1.164720    11.00000   -1.20000
AFIX   0
C15A  1    0.318512    0.574391    1.156925    11.00000    0.10102    0.07528 =
         0.05149   -0.00843   -0.00894    0.01080
AFIX  43
H83   2    0.319608    0.594216    1.182393    11.00000   -1.20000
AFIX   0
C14A  1    0.283977    0.617023    1.130280    11.00000    0.07887    0.05744 =
         0.05740   -0.01383    0.00286    0.00897
AFIX  43
H84   2    0.261879    0.665197    1.137478    11.00000   -1.20000
AFIX   0
N1    3    0.435830    0.571315    0.805877    11.00000    0.03336    0.06665 =
         0.06210    0.01085    0.00844   -0.00133
N1A   3    0.288397    0.696616    1.030511    11.00000    0.04097    0.05145 =
         0.05086    0.00177   -0.00364   -0.00134
O1    4    0.388838    0.318436    0.724801    11.00000    0.06247    0.07004 =
         0.07681   -0.00177    0.02044    0.01257
O4    4    0.387657    0.790838    0.903874    11.00000    0.04882    0.06797 =
         0.05887    0.00704   -0.01114   -0.00951
O1A   4    0.333265    0.495186    0.924877    11.00000    0.05634    0.05453 =
         0.05577   -0.00381   -0.00519   -0.01111
O4A   4    0.334376    0.949086    1.112584    11.00000    0.05729    0.07235 =
         0.07408   -0.02229    0.00265    0.00576
O3A   4    0.215630    0.576066    1.032715    11.00000    0.05200    0.09018 =
         0.06357    0.00017   -0.00982   -0.02802
O2A   4    0.206314    0.703049    1.076790    11.00000    0.04079    0.08201 =
         0.09054    0.00600    0.01171    0.01276
S1A   5    0.241050    0.639730    1.057689    11.00000    0.03547    0.07026 =
         0.06138    0.00390    0.00036   -0.00536
PART    1
S1    5    0.497008    0.606336    0.785690    21.00000    0.03534    0.12946 =
         0.09029    0.02384    0.02754    0.00427
O3    4    0.525214    0.529553    0.771353    21.00000    0.04430    0.11553 =
         0.14275    0.03490    0.04165    0.02454
O2    4    0.523370    0.663688    0.813362    21.00000    0.01858    0.16081 =
         0.09127    0.02108   -0.00076   -0.02092
AFIX  66
C13   1    0.475798    0.670514    0.746333    21.00000    0.03990    0.05211 =
         0.06797   -0.00825    0.01742   -0.00957
C14   1    0.480130    0.628435    0.710716    21.00000    0.06138    0.07783 =
         0.07351   -0.01700    0.00630    0.00159
AFIX  43
H14   2    0.495310    0.571988    0.709272    21.00000   -1.20000
AFIX  65
C15   1    0.461776    0.670722    0.677258    21.00000    0.07027    0.10379 =
         0.06680   -0.01492    0.01195    0.01113
AFIX  43
H15   2    0.464674    0.642568    0.653428    21.00000   -1.20000
AFIX  65
C16   1    0.439088    0.755089    0.679416    21.00000    0.08994    0.07968 =
         0.05986   -0.00709    0.00807   -0.00938
AFIX  43
H16   2    0.426808    0.783382    0.657030    21.00000   -1.20000
AFIX  65
C17   1    0.434756    0.797169    0.715032    21.00000    0.09173    0.06204 =
         0.06954   -0.00310   -0.01878   -0.00434
AFIX  43
H17   2    0.419577    0.853617    0.716476    21.00000   -1.20000
AFIX  65
C18   1    0.453110    0.754883    0.748491    21.00000    0.06455    0.07732 =
         0.06273   -0.01242    0.00007    0.01097
AFIX  43
H18   2    0.450212    0.783038    0.772321    21.00000   -1.20000
AFIX   0
PART    2
S1'   5    0.496954    0.608817    0.787533   -21.00000    0.02450    0.03561 =
         0.06486    0.00105   -0.00325   -0.00388
O3'   4    0.530053    0.532836    0.777830   -21.00000    0.02880    0.05907 =
         0.08937   -0.01232    0.00397    0.01069
O2'   4    0.522428    0.668268    0.814591   -21.00000    0.09407    0.06563 =
         0.06229   -0.01542   -0.00639   -0.03498
AFIX  66
C13'  1    0.475472    0.660036    0.744311   -21.00000    0.05935    0.05297 =
         0.05520    0.00327    0.00928   -0.00044
C14'  1    0.462175    0.627180    0.707839   -21.00000    0.08067    0.05403 =
         0.05770   -0.00746    0.01055   -0.01152
AFIX  43
H14'  2    0.466726    0.567581    0.702626   -21.00000   -1.20000
AFIX  65
C15'  1    0.442073    0.683403    0.679159   -21.00000    0.08643    0.05352 =
         0.04724   -0.01762    0.01796    0.01080
AFIX  43
H15'  2    0.433176    0.661420    0.654757   -21.00000   -1.20000
AFIX  65
C16'  1    0.435270    0.772481    0.686950   -21.00000    0.08444    0.05174 =
         0.04470   -0.01498   -0.00729    0.00377
AFIX  43
H16'  2    0.421821    0.810098    0.667761   -21.00000   -1.20000
AFIX  65
C17'  1    0.448568    0.805338    0.723422   -21.00000    0.07658    0.04542 =
         0.05135   -0.01044   -0.02739   -0.00684
AFIX  43
H17'  2    0.444016    0.864938    0.728635   -21.00000   -1.20000
AFIX  65
C18'  1    0.468669    0.749116    0.752102   -21.00000    0.06227    0.04790 =
         0.05676    0.00693   -0.01563   -0.00720
AFIX  43
H18'  2    0.477566    0.771100    0.776505   -21.00000   -1.20000
HKLF    4
 
REM  GIB in Pbca
REM R1 =  0.0618 for   7068 Fo > 4sig(Fo)  and  0.1140 for all  10729 data
REM    923 parameters refined using    140 restraints
 
END
; 
loop_ 
 _atom_site_label 
 _atom_site_type_symbol 
 _atom_site_fract_x 
 _atom_site_fract_y 
 _atom_site_fract_z 
 _atom_site_U_iso_or_equiv 
 _atom_site_adp_type 
 _atom_site_occupancy 
 _atom_site_symmetry_multiplicity 
 _atom_site_calc_flag 
 _atom_site_refinement_flags 
 _atom_site_disorder_assembly 
 _atom_site_disorder_group 
C8 C 0.40096(15) 0.5085(3) 0.78724(11) 0.0513(10) Uani 1 1 d . A . 
C9 C 0.41988(17) 0.4426(3) 0.76308(12) 0.0630(12) Uani 1 1 d . . . 
H9 H 0.4582 0.4361 0.7564 0.076 Uiso 1 1 calc R . . 
C10 C 0.37844(17) 0.3878(3) 0.74983(12) 0.0578(11) Uani 1 1 d . . . 
C19 C 0.33608(19) 0.2811(3) 0.71740(12) 0.0587(11) Uani 1 1 d . . . 
C20 C 0.3277(2) 0.2119(3) 0.69240(14) 0.0740(13) Uani 1 1 d . . . 
H20 H 0.3578 0.1861 0.6790 0.089 Uiso 1 1 calc R . . 
C21 C 0.2723(2) 0.1830(3) 0.68827(13) 0.0745(14) Uani 1 1 d . . . 
H21 H 0.2645 0.1366 0.6715 0.089 Uiso 1 1 calc R . . 
C22 C 0.2273(2) 0.2218(3) 0.70874(13) 0.0705(13) Uani 1 1 d . . . 
H22 H 0.1904 0.2002 0.7058 0.085 Uiso 1 1 calc R . . 
C23 C 0.23711(18) 0.2921(3) 0.73340(12) 0.0589(11) Uani 1 1 d . . . 
H23 H 0.2069 0.3177 0.7469 0.071 Uiso 1 1 calc R . . 
C24 C 0.29256(17) 0.3240(3) 0.73777(11) 0.0524(10) Uani 1 1 d . . . 
C11 C 0.32053(15) 0.3944(2) 0.75910(10) 0.0476(9) Uani 1 1 d . . . 
C12 C 0.30188(14) 0.4618(2) 0.78392(10) 0.0434(9) Uani 1 1 d . . . 
C7 C 0.34291(14) 0.5207(2) 0.79860(10) 0.0437(9) Uani 1 1 d . . . 
C6 C 0.34256(14) 0.5950(2) 0.82599(10) 0.0431(9) Uani 1 1 d . . . 
C5 C 0.30078(14) 0.6373(2) 0.84913(10) 0.0409(8) Uani 1 1 d . . . 
C4 C 0.31964(14) 0.7020(2) 0.87519(10) 0.0438(9) Uani 1 1 d . . . 
C42 C 0.29197(15) 0.7561(2) 0.90455(11) 0.0473(9) Uani 1 1 d . . . 
C41 C 0.23721(16) 0.7642(3) 0.91987(12) 0.0568(10) Uani 1 1 d . . . 
H41 H 0.2069 0.7320 0.9097 0.068 Uiso 1 1 calc R . . 
C40 C 0.22872(19) 0.8213(3) 0.95050(13) 0.0656(12) Uani 1 1 d . . . 
H40 H 0.1922 0.8264 0.9610 0.079 Uiso 1 1 calc R . . 
C39 C 0.2725(2) 0.8708(3) 0.96595(13) 0.0716(13) Uani 1 1 d . . . 
H39 H 0.2650 0.9082 0.9867 0.086 Uiso 1 1 calc R . . 
C38 C 0.3270(2) 0.8659(3) 0.95127(12) 0.0639(12) Uani 1 1 d . . . 
H38 H 0.3568 0.8999 0.9610 0.077 Uiso 1 1 calc R . . 
C37 C 0.33499(16) 0.8075(3) 0.92118(11) 0.0511(10) Uani 1 1 d . . . 
C3 C 0.37738(16) 0.7261(3) 0.87672(11) 0.0492(10) Uani 1 1 d . . . 
C2 C 0.41901(15) 0.6887(3) 0.85460(11) 0.0516(10) Uani 1 1 d . . . 
H2 H 0.4572 0.7055 0.8562 0.062 Uiso 1 1 calc R . . 
C1 C 0.40037(14) 0.6243(3) 0.82968(11) 0.0471(9) Uani 1 1 d . A . 
C25 C 0.23861(14) 0.4643(2) 0.78961(10) 0.0410(8) Uani 1 1 d . . . 
C26 C 0.20594(16) 0.5150(3) 0.76520(12) 0.0584(11) Uani 1 1 d . . . 
H26 H 0.2238 0.5538 0.7483 0.070 Uiso 1 1 calc R . . 
C27 C 0.14709(17) 0.5093(3) 0.76541(14) 0.0712(13) Uani 1 1 d . . . 
H27 H 0.1255 0.5441 0.7488 0.085 Uiso 1 1 calc R . . 
C28 C 0.12059(17) 0.4523(3) 0.79016(14) 0.0686(13) Uani 1 1 d . . . 
H28 H 0.0809 0.4478 0.7902 0.082 Uiso 1 1 calc R . . 
C29 C 0.15230(18) 0.4022(3) 0.81464(13) 0.0682(12) Uani 1 1 d . . . 
H29 H 0.1340 0.3637 0.8315 0.082 Uiso 1 1 calc R . . 
C30 C 0.21139(16) 0.4076(3) 0.81483(12) 0.0548(10) Uani 1 1 d . . . 
H30 H 0.2327 0.3732 0.8318 0.066 Uiso 1 1 calc R . . 
C31 C 0.23719(14) 0.6247(2) 0.84861(10) 0.0444(9) Uani 1 1 d . . . 
C32 C 0.20468(16) 0.6816(3) 0.82665(13) 0.0647(12) Uani 1 1 d . . . 
H32 H 0.2224 0.7197 0.8093 0.078 Uiso 1 1 calc R . . 
C33 C 0.14563(19) 0.6821(4) 0.83041(15) 0.0820(15) Uani 1 1 d . . . 
H33 H 0.1237 0.7201 0.8154 0.098 Uiso 1 1 calc R . . 
C34 C 0.11945(18) 0.6265(4) 0.85626(16) 0.0859(17) Uani 1 1 d . . . 
H34 H 0.0799 0.6275 0.8591 0.103 Uiso 1 1 calc R . . 
C35 C 0.15159(19) 0.5700(3) 0.87780(15) 0.0766(14) Uani 1 1 d . . . 
H35 H 0.1336 0.5317 0.8949 0.092 Uiso 1 1 calc R . . 
C36 C 0.21050(16) 0.5690(3) 0.87457(12) 0.0589(11) Uani 1 1 d . . . 
H36 H 0.2321 0.5310 0.8898 0.071 Uiso 1 1 calc R . . 
C8A C 0.32336(14) 0.6527(2) 1.00274(10) 0.0425(8) Uani 1 1 d . . . 
C9A C 0.30343(15) 0.5921(2) 0.97640(11) 0.0482(9) Uani 1 1 d . . . 
H9A H 0.2652 0.5752 0.9751 0.058 Uiso 1 1 calc R . . 
C10A C 0.34424(16) 0.5591(2) 0.95239(10) 0.0456(9) Uani 1 1 d . . . 
C19A C 0.38571(17) 0.4762(2) 0.90829(11) 0.0488(9) Uani 1 1 d . . . 
C20A C 0.3936(2) 0.4126(3) 0.88051(12) 0.0604(11) Uani 1 1 d . . . 
H20A H 0.3634 0.3794 0.8709 0.072 Uiso 1 1 calc R . . 
C21A C 0.4488(2) 0.4007(3) 0.86773(13) 0.0666(12) Uani 1 1 d . . . 
H21A H 0.4563 0.3583 0.8490 0.080 Uiso 1 1 calc R . . 
C22A C 0.49323(19) 0.4505(3) 0.88224(12) 0.0631(11) Uani 1 1 d . . . 
H22A H 0.5301 0.4409 0.8730 0.076 Uiso 1 1 calc R . . 
C23A C 0.48433(17) 0.5146(3) 0.91027(11) 0.0548(10) Uani 1 1 d . . . 
H23A H 0.5147 0.5480 0.9196 0.066 Uiso 1 1 calc R . . 
C24A C 0.42916(16) 0.5279(2) 0.92410(10) 0.0455(9) Uani 1 1 d . . . 
C11A C 0.40200(15) 0.5838(2) 0.95285(10) 0.0410(8) Uani 1 1 d . . . 
C12A C 0.42108(14) 0.6482(2) 0.97884(10) 0.0402(8) Uani 1 1 d . . . 
C7A C 0.38032(14) 0.6861(2) 1.00417(10) 0.0387(8) Uani 1 1 d . . . 
C6A C 0.38024(14) 0.7571(2) 1.03322(10) 0.0403(8) Uani 1 1 d . . . 
C5A C 0.42009(14) 0.8194(2) 1.04659(10) 0.0417(8) Uani 1 1 d . . . 
C4A C 0.40122(15) 0.8827(2) 1.07315(10) 0.0461(9) Uani 1 1 d . . . 
C42A C 0.42842(16) 0.9557(2) 1.09331(11) 0.0494(9) Uani 1 1 d . . . 
C41A C 0.48300(18) 0.9928(3) 1.09493(12) 0.0570(10) Uani 1 1 d . . . 
H41A H 0.5127 0.9704 1.0799 0.068 Uiso 1 1 calc R . . 
C40A C 0.4919(2) 1.0637(3) 1.11932(13) 0.0670(12) Uani 1 1 d . . . 
H40A H 0.5283 1.0884 1.1207 0.080 Uiso 1 1 calc R . . 
C39A C 0.4486(2) 1.0990(3) 1.14165(14) 0.0768(14) Uani 1 1 d . . . 
H39A H 0.4561 1.1469 1.1576 0.092 Uiso 1 1 calc R . . 
C38A C 0.3943(2) 1.0639(3) 1.14052(13) 0.0725(13) Uani 1 1 d . . . 
H38A H 0.3648 1.0870 1.1554 0.087 Uiso 1 1 calc R . . 
C37A C 0.38587(18) 0.9932(3) 1.11632(13) 0.0603(11) Uani 1 1 d . . . 
C3A C 0.34467(17) 0.8828(3) 1.08633(11) 0.0531(10) Uani 1 1 d . . . 
C2A C 0.30427(16) 0.8229(3) 1.07461(12) 0.0563(10) Uani 1 1 d . . . 
H2A H 0.2668 0.8237 1.0837 0.068 Uiso 1 1 calc R . . 
C1A C 0.32362(15) 0.7620(2) 1.04849(11) 0.0461(9) Uani 1 1 d . . . 
C25A C 0.48429(14) 0.6659(2) 0.97670(10) 0.0419(8) Uani 1 1 d . . . 
C30A C 0.50731(15) 0.7205(2) 0.94882(12) 0.0531(10) Uani 1 1 d . . . 
H30A H 0.4831 0.7548 0.9337 0.064 Uiso 1 1 calc R . . 
C29A C 0.56574(17) 0.7250(3) 0.94301(12) 0.0598(11) Uani 1 1 d . . . 
H29A H 0.5807 0.7627 0.9243 0.072 Uiso 1 1 calc R . . 
C28A C 0.60174(16) 0.6735(3) 0.96492(12) 0.0560(10) Uani 1 1 d . . . 
H28A H 0.6411 0.6760 0.9609 0.067 Uiso 1 1 calc R . . 
C27A C 0.57962(16) 0.6188(3) 0.99253(12) 0.0599(11) Uani 1 1 d . . . 
H27A H 0.6040 0.5842 1.0074 0.072 Uiso 1 1 calc R . . 
C26A C 0.52125(16) 0.6148(3) 0.99851(11) 0.0522(10) Uani 1 1 d . . . 
H26A H 0.5066 0.5774 1.0174 0.063 Uiso 1 1 calc R . . 
C31A C 0.48216(15) 0.8254(2) 1.03620(10) 0.0451(9) Uani 1 1 d . . . 
C36A C 0.50174(19) 0.8834(3) 1.00837(12) 0.0650(12) Uani 1 1 d . . . 
H36A H 0.4758 0.9131 0.9927 0.078 Uiso 1 1 calc R . . 
C35A C 0.5601(2) 0.8973(4) 1.00382(15) 0.0824(15) Uani 1 1 d . . . 
H35A H 0.5730 0.9359 0.9849 0.099 Uiso 1 1 calc R . . 
C34A C 0.5986(2) 0.8549(4) 1.02685(17) 0.0834(16) Uani 1 1 d . . . 
H34A H 0.6376 0.8655 1.0241 0.100 Uiso 1 1 calc R . . 
C33A C 0.57947(19) 0.7972(3) 1.05381(16) 0.0790(15) Uani 1 1 d . . . 
H33A H 0.6057 0.7670 1.0692 0.095 Uiso 1 1 calc R . . 
C32A C 0.52168(16) 0.7825(3) 1.05878(12) 0.0579(11) Uani 1 1 d . . . 
H32A H 0.5093 0.7431 1.0776 0.069 Uiso 1 1 calc R . . 
C13A C 0.28331(15) 0.5858(2) 1.09252(11) 0.0493(9) Uani 1 1 d . . . 
C18A C 0.31555(19) 0.5140(3) 1.08204(12) 0.0648(12) Uani 1 1 d . . . 
H80 H 0.3144 0.4931 1.0568 0.078 Uiso 1 1 calc R . . 
C17A C 0.3494(2) 0.4737(3) 1.10919(14) 0.0763(14) Uani 1 1 d . . . 
H81 H 0.3716 0.4253 1.1023 0.092 Uiso 1 1 calc R . . 
C16A C 0.3507(2) 0.5044(3) 1.14646(14) 0.0693(12) Uani 1 1 d . . . 
H82 H 0.3738 0.4768 1.1647 0.083 Uiso 1 1 calc R . . 
C15A C 0.3185(2) 0.5744(3) 1.15692(13) 0.0759(14) Uani 1 1 d . . . 
H83 H 0.3196 0.5942 1.1824 0.091 Uiso 1 1 calc R . . 
C14A C 0.28398(19) 0.6170(3) 1.13028(12) 0.0646(12) Uani 1 1 d . . . 
H84 H 0.2619 0.6652 1.1375 0.077 Uiso 1 1 calc R . . 
N1 N 0.43583(12) 0.5713(2) 0.80588(9) 0.0540(8) Uani 1 1 d D . . 
N1A N 0.28840(12) 0.6966(2) 1.03051(9) 0.0478(8) Uani 1 1 d . . . 
O1 O 0.38884(12) 0.3184(2) 0.72480(9) 0.0698(8) Uani 1 1 d . . . 
O4 O 0.38766(11) 0.79084(18) 0.90387(8) 0.0586(7) Uani 1 1 d . . . 
O1A O 0.33326(11) 0.49519(17) 0.92488(8) 0.0555(7) Uani 1 1 d . . . 
O4A O 0.33438(12) 0.94909(19) 1.11258(9) 0.0679(8) Uani 1 1 d . . . 
O3A O 0.21563(11) 0.5761(2) 1.03272(8) 0.0686(8) Uani 1 1 d . . . 
O2A O 0.20631(11) 0.7030(2) 1.07679(9) 0.0711(8) Uani 1 1 d . . . 
S1A S 0.24105(4) 0.63973(7) 1.05769(3) 0.0557(3) Uani 1 1 d . . . 
S1 S 0.49701(19) 0.6063(4) 0.7857(2) 0.085(3) Uani 0.67(4) 1 d PDU A 1 
O3 O 0.5252(8) 0.5296(10) 0.7714(7) 0.101(5) Uani 0.67(4) 1 d PDU A 1 
O2 O 0.5234(4) 0.6637(9) 0.8134(4) 0.090(4) Uani 0.67(4) 1 d PDU A 1 
C13 C 0.4758(4) 0.6705(7) 0.7463(2) 0.053(3) Uani 0.67(4) 1 d PGDU A 1 
C14 C 0.4801(7) 0.6284(6) 0.7107(3) 0.071(3) Uani 0.67(4) 1 d PGU A 1 
H14 H 0.4953 0.5720 0.7093 0.085 Uiso 0.67(4) 1 calc PR A 1 
C15 C 0.4618(7) 0.6707(9) 0.6773(2) 0.080(3) Uani 0.67(4) 1 d PGU A 1 
H15 H 0.4647 0.6426 0.6534 0.096 Uiso 0.67(4) 1 calc PR A 1 
C16 C 0.4391(4) 0.7551(11) 0.6794(3) 0.076(3) Uani 0.67(4) 1 d PGU A 1 
H16 H 0.4268 0.7834 0.6570 0.092 Uiso 0.67(4) 1 calc PR A 1 
C17 C 0.4348(6) 0.7972(8) 0.7150(5) 0.074(3) Uani 0.67(4) 1 d PGU A 1 
H17 H 0.4196 0.8536 0.7165 0.089 Uiso 0.67(4) 1 calc PR A 1 
C18 C 0.4531(7) 0.7549(7) 0.7485(3) 0.068(3) Uani 0.67(4) 1 d PGU A 1 
H18 H 0.4502 0.7830 0.7723 0.082 Uiso 0.67(4) 1 calc PR A 1 
S1' S 0.4970(3) 0.6088(4) 0.7875(3) 0.042(3) Uani 0.33(4) 1 d PDU A 2 
O3' O 0.5301(14) 0.5328(17) 0.7778(12) 0.059(6) Uani 0.33(4) 1 d PDU A 2 
O2' O 0.5224(10) 0.6683(15) 0.8146(7) 0.074(7) Uani 0.33(4) 1 d PDU A 2 
C13' C 0.4755(10) 0.6600(16) 0.7443(5) 0.056(6) Uani 0.33(4) 1 d PGDU A 2 
C14' C 0.4622(14) 0.6272(10) 0.7078(6) 0.064(5) Uani 0.33(4) 1 d PGU A 2 
H14' H 0.4667 0.5676 0.7026 0.077 Uiso 0.33(4) 1 calc PR A 2 
C15' C 0.4421(14) 0.6834(14) 0.6792(4) 0.062(5) Uani 0.33(4) 1 d PGU A 2 
H15' H 0.4332 0.6614 0.6548 0.075 Uiso 0.33(4) 1 calc PR A 2 
C16' C 0.4353(9) 0.7725(13) 0.6870(6) 0.060(5) Uani 0.33(4) 1 d PGU A 2 
H16' H 0.4218 0.8101 0.6678 0.072 Uiso 0.33(4) 1 calc PR A 2 
C17' C 0.4486(12) 0.8053(11) 0.7234(7) 0.058(5) Uani 0.33(4) 1 d PGU A 2 
H17' H 0.4440 0.8649 0.7286 0.069 Uiso 0.33(4) 1 calc PR A 2 
C18' C 0.4687(12) 0.7491(16) 0.7521(4) 0.056(5) Uani 0.33(4) 1 d PGU A 2 
H18' H 0.4776 0.7711 0.7765 0.067 Uiso 0.33(4) 1 calc PR A 2 
 
loop_ 
 _atom_site_aniso_label 
 _atom_site_aniso_U_11 
 _atom_site_aniso_U_22 
 _atom_site_aniso_U_33 
 _atom_site_aniso_U_23 
 _atom_site_aniso_U_13 
 _atom_site_aniso_U_12 
C8 0.038(2) 0.064(3) 0.051(2) 0.010(2) 0.0119(18) 0.0064(19) 
C9 0.040(2) 0.077(3) 0.072(3) 0.008(2) 0.019(2) 0.004(2) 
C10 0.056(2) 0.059(3) 0.058(3) 0.005(2) 0.015(2) 0.015(2) 
C19 0.073(3) 0.050(2) 0.054(3) 0.009(2) 0.008(2) 0.013(2) 
C20 0.092(4) 0.060(3) 0.071(3) 0.003(3) 0.008(3) 0.018(3) 
C21 0.108(4) 0.051(3) 0.065(3) 0.000(2) -0.008(3) 0.021(3) 
C22 0.081(3) 0.060(3) 0.070(3) 0.004(2) -0.015(3) 0.009(2) 
C23 0.066(3) 0.056(3) 0.054(3) 0.005(2) -0.003(2) 0.012(2) 
C24 0.057(2) 0.055(2) 0.046(2) 0.0111(19) 0.0023(19) 0.009(2) 
C11 0.049(2) 0.051(2) 0.043(2) 0.0084(18) 0.0022(17) 0.0099(18) 
C12 0.0400(19) 0.052(2) 0.039(2) 0.0120(18) 0.0032(16) 0.0059(17) 
C7 0.0340(18) 0.054(2) 0.043(2) 0.0104(18) 0.0032(16) 0.0032(17) 
C6 0.0377(19) 0.050(2) 0.041(2) 0.0126(18) 0.0019(16) 0.0013(17) 
C5 0.0364(18) 0.046(2) 0.040(2) 0.0105(17) 0.0035(16) -0.0012(16) 
C4 0.0379(19) 0.048(2) 0.045(2) 0.0106(18) -0.0018(16) 0.0016(17) 
C42 0.047(2) 0.044(2) 0.051(2) 0.0113(18) -0.0039(18) 0.0033(18) 
C41 0.049(2) 0.056(3) 0.065(3) 0.001(2) 0.000(2) 0.006(2) 
C40 0.066(3) 0.062(3) 0.068(3) -0.001(2) 0.001(2) 0.015(2) 
C39 0.084(3) 0.064(3) 0.067(3) -0.002(2) -0.009(3) 0.021(3) 
C38 0.082(3) 0.048(2) 0.062(3) 0.001(2) -0.019(2) 0.002(2) 
C37 0.051(2) 0.049(2) 0.053(2) 0.013(2) -0.0075(19) 0.0006(19) 
C3 0.044(2) 0.058(3) 0.045(2) 0.013(2) -0.0056(18) -0.0053(19) 
C2 0.036(2) 0.063(3) 0.056(2) 0.014(2) -0.0016(18) -0.0069(19) 
C1 0.0337(18) 0.057(2) 0.051(2) 0.013(2) 0.0041(17) -0.0029(18) 
C25 0.0366(18) 0.043(2) 0.044(2) 0.0019(17) 0.0001(16) -0.0005(16) 
C26 0.044(2) 0.059(3) 0.072(3) 0.022(2) -0.008(2) 0.0008(19) 
C27 0.048(2) 0.070(3) 0.095(4) 0.013(3) -0.020(2) 0.002(2) 
C28 0.039(2) 0.073(3) 0.094(4) -0.009(3) -0.001(2) -0.008(2) 
C29 0.060(3) 0.069(3) 0.076(3) 0.004(3) 0.020(2) -0.016(2) 
C30 0.051(2) 0.054(2) 0.059(3) 0.011(2) 0.0052(19) -0.0025(19) 
C31 0.0340(18) 0.055(2) 0.045(2) -0.0044(18) 0.0042(16) 0.0005(17) 
C32 0.045(2) 0.086(3) 0.063(3) -0.001(3) -0.005(2) 0.006(2) 
C33 0.048(3) 0.115(4) 0.083(4) -0.015(3) -0.013(3) 0.024(3) 
C34 0.033(2) 0.126(5) 0.099(4) -0.043(4) 0.009(3) -0.002(3) 
C35 0.049(3) 0.083(3) 0.098(4) -0.017(3) 0.027(3) -0.014(3) 
C36 0.044(2) 0.060(3) 0.073(3) -0.001(2) 0.014(2) -0.0043(19) 
C8A 0.0436(19) 0.038(2) 0.046(2) 0.0073(17) -0.0068(17) -0.0045(16) 
C9A 0.042(2) 0.048(2) 0.054(2) 0.0078(19) -0.0043(18) -0.0084(18) 
C10A 0.055(2) 0.040(2) 0.042(2) 0.0050(17) -0.0097(18) -0.0082(18) 
C19A 0.060(2) 0.043(2) 0.044(2) 0.0071(18) -0.0027(19) -0.0022(19) 
C20A 0.078(3) 0.051(3) 0.052(3) 0.000(2) -0.006(2) -0.006(2) 
C21A 0.082(3) 0.060(3) 0.058(3) -0.002(2) 0.006(2) 0.003(2) 
C22A 0.067(3) 0.062(3) 0.060(3) -0.003(2) 0.009(2) 0.003(2) 
C23A 0.062(3) 0.053(2) 0.049(2) -0.001(2) -0.004(2) -0.004(2) 
C24A 0.056(2) 0.039(2) 0.041(2) 0.0070(17) -0.0016(18) 0.0001(18) 
C11A 0.048(2) 0.0364(19) 0.039(2) 0.0052(16) -0.0023(16) -0.0048(16) 
C12A 0.046(2) 0.0341(19) 0.041(2) 0.0062(16) -0.0064(16) -0.0022(16) 
C7A 0.0414(19) 0.0326(18) 0.042(2) 0.0061(16) -0.0057(16) 0.0002(15) 
C6A 0.0443(19) 0.0365(19) 0.040(2) 0.0044(16) -0.0067(16) -0.0015(16) 
C5A 0.0424(19) 0.044(2) 0.039(2) 0.0026(17) -0.0052(16) 0.0008(16) 
C4A 0.048(2) 0.046(2) 0.044(2) 0.0011(18) -0.0065(17) -0.0008(18) 
C42A 0.056(2) 0.046(2) 0.045(2) -0.0006(18) -0.0051(19) -0.0009(19) 
C41A 0.066(3) 0.053(2) 0.052(2) -0.001(2) -0.005(2) -0.007(2) 
C40A 0.075(3) 0.062(3) 0.064(3) -0.007(2) -0.002(2) -0.015(2) 
C39A 0.095(4) 0.064(3) 0.071(3) -0.018(3) -0.006(3) -0.008(3) 
C38A 0.080(3) 0.065(3) 0.073(3) -0.026(3) 0.002(3) 0.006(3) 
C37A 0.063(3) 0.053(3) 0.065(3) -0.007(2) -0.005(2) 0.003(2) 
C3A 0.054(2) 0.053(2) 0.052(2) -0.007(2) -0.0027(19) 0.005(2) 
C2A 0.045(2) 0.061(3) 0.063(3) -0.004(2) 0.004(2) 0.002(2) 
C1A 0.0414(19) 0.049(2) 0.047(2) 0.0028(19) -0.0027(17) 0.0020(17) 
C25A 0.0416(19) 0.042(2) 0.043(2) -0.0042(17) -0.0009(16) -0.0034(16) 
C30A 0.044(2) 0.052(2) 0.062(3) 0.015(2) -0.0021(19) -0.0009(18) 
C29A 0.053(2) 0.061(3) 0.065(3) 0.012(2) 0.007(2) -0.004(2) 
C28A 0.043(2) 0.056(3) 0.069(3) -0.008(2) 0.003(2) -0.0005(19) 
C27A 0.050(2) 0.066(3) 0.064(3) 0.009(2) -0.012(2) 0.003(2) 
C26A 0.051(2) 0.056(2) 0.049(2) 0.011(2) -0.0072(19) -0.0030(19) 
C31A 0.045(2) 0.046(2) 0.044(2) -0.0062(18) -0.0023(17) -0.0077(17) 
C36A 0.066(3) 0.075(3) 0.054(3) 0.005(2) 0.002(2) -0.017(2) 
C35A 0.081(3) 0.090(4) 0.075(3) -0.012(3) 0.024(3) -0.039(3) 
C34A 0.050(3) 0.104(4) 0.096(4) -0.043(3) 0.013(3) -0.021(3) 
C33A 0.049(3) 0.087(4) 0.102(4) -0.023(3) -0.014(3) 0.002(3) 
C32A 0.051(2) 0.053(2) 0.070(3) -0.002(2) -0.007(2) -0.0011(19) 
C13A 0.042(2) 0.049(2) 0.057(2) -0.001(2) 0.0051(18) -0.0057(18) 
C18A 0.078(3) 0.065(3) 0.051(3) -0.003(2) 0.003(2) 0.014(2) 
C17A 0.089(3) 0.065(3) 0.075(3) 0.003(3) 0.008(3) 0.024(3) 
C16A 0.081(3) 0.063(3) 0.065(3) 0.009(2) -0.007(3) 0.002(3) 
C15A 0.101(4) 0.075(3) 0.051(3) -0.008(2) -0.009(3) 0.011(3) 
C14A 0.079(3) 0.057(3) 0.057(3) -0.014(2) 0.003(2) 0.009(2) 
N1 0.0334(16) 0.067(2) 0.062(2) 0.0108(18) 0.0084(15) -0.0013(16) 
N1A 0.0410(16) 0.0514(19) 0.0509(19) 0.0018(16) -0.0036(14) -0.0013(15) 
O1 0.0625(19) 0.070(2) 0.077(2) -0.0018(17) 0.0204(16) 0.0126(16) 
O4 0.0488(16) 0.0680(18) 0.0589(17) 0.0070(15) -0.0111(14) -0.0095(14) 
O1A 0.0563(16) 0.0545(17) 0.0558(17) -0.0038(14) -0.0052(13) -0.0111(13) 
O4A 0.0573(17) 0.072(2) 0.074(2) -0.0223(17) 0.0027(15) 0.0058(15) 
O3A 0.0520(16) 0.090(2) 0.0636(18) 0.0002(17) -0.0098(14) -0.0280(16) 
O2A 0.0408(15) 0.082(2) 0.091(2) 0.0060(18) 0.0117(15) 0.0128(15) 
S1A 0.0355(5) 0.0703(7) 0.0614(6) 0.0039(6) 0.0004(5) -0.0054(5) 
S1 0.035(3) 0.129(6) 0.090(4) 0.024(3) 0.028(3) 0.004(3) 
O3 0.044(7) 0.116(8) 0.143(13) 0.035(6) 0.042(7) 0.025(6) 
O2 0.019(4) 0.161(10) 0.091(7) 0.021(6) -0.001(4) -0.021(5) 
C13 0.040(6) 0.052(5) 0.068(5) -0.008(4) 0.017(5) -0.010(4) 
C14 0.061(6) 0.078(6) 0.074(5) -0.017(4) 0.006(4) 0.002(4) 
C15 0.070(7) 0.104(7) 0.067(5) -0.015(5) 0.012(4) 0.011(5) 
C16 0.090(6) 0.080(7) 0.060(5) -0.007(5) 0.008(5) -0.009(5) 
C17 0.092(7) 0.062(5) 0.070(7) -0.003(5) -0.019(6) -0.004(5) 
C18 0.065(7) 0.077(6) 0.063(5) -0.012(5) 0.000(4) 0.011(5) 
S1' 0.024(5) 0.036(5) 0.065(5) 0.001(3) -0.003(4) -0.004(3) 
O3' 0.029(9) 0.059(9) 0.089(11) -0.012(8) 0.004(8) 0.011(7) 
O2' 0.094(16) 0.066(12) 0.062(12) -0.015(10) -0.006(10) -0.035(10) 
C13' 0.059(13) 0.053(9) 0.055(9) 0.003(7) 0.009(10) 0.000(9) 
C14' 0.081(13) 0.054(8) 0.058(8) -0.007(6) 0.011(8) -0.012(8) 
C15' 0.086(14) 0.054(8) 0.047(7) -0.018(6) 0.018(7) 0.011(9) 
C16' 0.084(11) 0.052(8) 0.045(8) -0.015(7) -0.007(8) 0.004(8) 
C17' 0.077(11) 0.045(7) 0.051(9) -0.010(6) -0.027(8) -0.007(7) 
C18' 0.062(11) 0.048(8) 0.057(8) 0.007(6) -0.016(7) -0.007(7) 
 
_geom_special_details 
; 
 All esds (except the esd in the dihedral angle between two l.s. planes) 
 are estimated using the full covariance matrix.  The cell esds are taken 
 into account individually in the estimation of esds in distances, angles 
 and torsion angles; correlations between esds in cell parameters are only 
 used when they are defined by crystal symmetry.  An approximate (isotropic) 
 treatment of cell esds is used for estimating esds involving l.s. planes. 
; 
 
loop_ 
 _geom_bond_atom_site_label_1 
 _geom_bond_atom_site_label_2 
 _geom_bond_distance 
 _geom_bond_site_symmetry_2 
 _geom_bond_publ_flag 
C8 C9 1.377(5) . ? 
C8 N1 1.411(5) . ? 
C8 C7 1.424(5) . ? 
C9 C10 1.357(6) . ? 
C9 H9 0.9300 . ? 
C10 O1 1.385(5) . ? 
C10 C11 1.394(5) . ? 
C19 C20 1.375(6) . ? 
C19 O1 1.381(5) . ? 
C19 C24 1.398(5) . ? 
C20 C21 1.375(6) . ? 
C20 H20 0.9300 . ? 
C21 C22 1.397(6) . ? 
C21 H21 0.9300 . ? 
C22 C23 1.386(6) . ? 
C22 H22 0.9300 . ? 
C23 C24 1.392(5) . ? 
C23 H23 0.9300 . ? 
C24 C11 1.454(5) . ? 
C11 C12 1.404(5) . ? 
C12 C7 1.407(5) . ? 
C12 C25 1.492(5) . ? 
C7 C6 1.473(5) . ? 
C6 C5 1.416(5) . ? 
C6 C1 1.428(5) . ? 
C5 C4 1.404(5) . ? 
C5 C31 1.498(5) . ? 
C4 C3 1.399(5) . ? 
C4 C42 1.457(5) . ? 
C42 C41 1.390(5) . ? 
C42 C37 1.396(5) . ? 
C41 C40 1.382(5) . ? 
C41 H41 0.9300 . ? 
C40 C39 1.377(6) . ? 
C40 H40 0.9300 . ? 
C39 C38 1.373(6) . ? 
C39 H39 0.9300 . ? 
C38 C37 1.379(5) . ? 
C38 H38 0.9300 . ? 
C37 O4 1.391(4) . ? 
C3 C2 1.362(5) . ? 
C3 O4 1.380(4) . ? 
C2 C1 1.375(5) . ? 
C2 H2 0.9300 . ? 
C1 N1 1.418(5) . ? 
C25 C26 1.373(5) . ? 
C25 C30 1.381(5) . ? 
C26 C27 1.378(5) . ? 
C26 H26 0.9300 . ? 
C27 C28 1.366(6) . ? 
C27 H27 0.9300 . ? 
C28 C29 1.358(6) . ? 
C28 H28 0.9300 . ? 
C29 C30 1.383(5) . ? 
C29 H29 0.9300 . ? 
C30 H30 0.9300 . ? 
C31 C32 1.379(5) . ? 
C31 C36 1.382(5) . ? 
C32 C33 1.386(6) . ? 
C32 H32 0.9300 . ? 
C33 C34 1.373(7) . ? 
C33 H33 0.9300 . ? 
C34 C35 1.362(7) . ? 
C34 H34 0.9300 . ? 
C35 C36 1.381(5) . ? 
C35 H35 0.9300 . ? 
C36 H36 0.9300 . ? 
C8A C9A 1.375(5) . ? 
C8A C7A 1.425(5) . ? 
C8A N1A 1.426(4) . ? 
C9A C10A 1.360(5) . ? 
C9A H9A 0.9300 . ? 
C10A O1A 1.383(4) . ? 
C10A C11A 1.401(5) . ? 
C19A C20A 1.375(5) . ? 
C19A O1A 1.383(4) . ? 
C19A C24A 1.395(5) . ? 
C20A C21A 1.375(6) . ? 
C20A H20A 0.9300 . ? 
C21A C22A 1.378(6) . ? 
C21A H21A 0.9300 . ? 
C22A C23A 1.389(5) . ? 
C22A H22A 0.9300 . ? 
C23A C24A 1.390(5) . ? 
C23A H23A 0.9300 . ? 
C24A C11A 1.453(5) . ? 
C11A C12A 1.401(5) . ? 
C12A C7A 1.416(5) . ? 
C12A C25A 1.503(5) . ? 
C7A C6A 1.473(5) . ? 
C6A C5A 1.406(5) . ? 
C6A C1A 1.426(5) . ? 
C5A C4A 1.401(5) . ? 
C5A C31A 1.497(5) . ? 
C4A C3A 1.398(5) . ? 
C4A C42A 1.456(5) . ? 
C42A C37A 1.395(5) . ? 
C42A C41A 1.396(5) . ? 
C41A C40A 1.384(5) . ? 
C41A H41A 0.9300 . ? 
C40A C39A 1.382(6) . ? 
C40A H40A 0.9300 . ? 
C39A C38A 1.375(6) . ? 
C39A H39A 0.9300 . ? 
C38A C37A 1.377(6) . ? 
C38A H38A 0.9300 . ? 
C37A O4A 1.383(5) . ? 
C3A C2A 1.372(5) . ? 
C3A O4A 1.377(4) . ? 
C2A C1A 1.371(5) . ? 
C2A H2A 0.9300 . ? 
C1A N1A 1.432(4) . ? 
C25A C30A 1.381(5) . ? 
C25A C26A 1.384(5) . ? 
C30A C29A 1.382(5) . ? 
C30A H30A 0.9300 . ? 
C29A C28A 1.375(5) . ? 
C29A H29A 0.9300 . ? 
C28A C27A 1.367(5) . ? 
C28A H28A 0.9300 . ? 
C27A C26A 1.381(5) . ? 
C27A H27A 0.9300 . ? 
C26A H26A 0.9300 . ? 
C31A C32A 1.374(5) . ? 
C31A C36A 1.382(5) . ? 
C36A C35A 1.389(6) . ? 
C36A H36A 0.9300 . ? 
C35A C34A 1.363(7) . ? 
C35A H35A 0.9300 . ? 
C34A C33A 1.355(7) . ? 
C34A H34A 0.9300 . ? 
C33A C32A 1.379(6) . ? 
C33A H33A 0.9300 . ? 
C32A H32A 0.9300 . ? 
C13A C18A 1.374(5) . ? 
C13A C14A 1.388(5) . ? 
C13A S1A 1.759(4) . ? 
C18A C17A 1.372(6) . ? 
C18A H80 0.9300 . ? 
C17A C16A 1.369(6) . ? 
C17A H81 0.9300 . ? 
C16A C15A 1.352(6) . ? 
C16A H82 0.9300 . ? 
C15A C14A 1.385(6) . ? 
C15A H83 0.9300 . ? 
C14A H84 0.9300 . ? 
N1 S1' 1.663(6) . ? 
N1 S1 1.677(4) . ? 
N1A S1A 1.689(3) . ? 
O3A S1A 1.426(3) . ? 
O2A S1A 1.421(3) . ? 
S1 O3 1.429(6) . ? 
S1 O2 1.433(5) . ? 
S1 C13 1.745(5) . ? 
C13 C14 1.3900 . ? 
C13 C18 1.3900 . ? 
C14 C15 1.3900 . ? 
C14 H14 0.9300 . ? 
C15 C16 1.3900 . ? 
C15 H15 0.9300 . ? 
C16 C17 1.3900 . ? 
C16 H16 0.9300 . ? 
C17 C18 1.3900 . ? 
C17 H17 0.9300 . ? 
C18 H18 0.9300 . ? 
S1' O2' 1.430(7) . ? 
S1' O3' 1.430(8) . ? 
S1' C13' 1.757(7) . ? 
C13' C14' 1.3900 . ? 
C13' C18' 1.3900 . ? 
C14' C15' 1.3900 . ? 
C14' H14' 0.9300 . ? 
C15' C16' 1.3900 . ? 
C15' H15' 0.9300 . ? 
C16' C17' 1.3900 . ? 
C16' H16' 0.9300 . ? 
C17' C18' 1.3900 . ? 
C17' H17' 0.9300 . ? 
C18' H18' 0.9300 . ? 
 
loop_ 
 _geom_angle_atom_site_label_1 
 _geom_angle_atom_site_label_2 
 _geom_angle_atom_site_label_3 
 _geom_angle 
 _geom_angle_site_symmetry_1 
 _geom_angle_site_symmetry_3 
 _geom_angle_publ_flag 
C9 C8 N1 125.7(3) . . ? 
C9 C8 C7 124.6(4) . . ? 
N1 C8 C7 109.6(3) . . ? 
C10 C9 C8 115.0(4) . . ? 
C10 C9 H9 122.5 . . ? 
C8 C9 H9 122.5 . . ? 
C9 C10 O1 123.5(4) . . ? 
C9 C10 C11 124.8(4) . . ? 
O1 C10 C11 111.6(4) . . ? 
C20 C19 O1 123.9(4) . . ? 
C20 C19 C24 124.7(5) . . ? 
O1 C19 C24 111.4(4) . . ? 
C21 C20 C19 116.4(5) . . ? 
C21 C20 H20 121.8 . . ? 
C19 C20 H20 121.8 . . ? 
C20 C21 C22 121.3(5) . . ? 
C20 C21 H21 119.3 . . ? 
C22 C21 H21 119.3 . . ? 
C23 C22 C21 120.9(5) . . ? 
C23 C22 H22 119.6 . . ? 
C21 C22 H22 119.6 . . ? 
C22 C23 C24 119.3(4) . . ? 
C22 C23 H23 120.4 . . ? 
C24 C23 H23 120.4 . . ? 
C23 C24 C19 117.4(4) . . ? 
C23 C24 C11 136.9(4) . . ? 
C19 C24 C11 105.8(4) . . ? 
C10 C11 C12 119.6(4) . . ? 
C10 C11 C24 105.4(3) . . ? 
C12 C11 C24 134.9(3) . . ? 
C11 C12 C7 118.2(3) . . ? 
C11 C12 C25 114.0(3) . . ? 
C7 C12 C25 127.7(3) . . ? 
C12 C7 C8 117.8(3) . . ? 
C12 C7 C6 135.7(3) . . ? 
C8 C7 C6 106.4(3) . . ? 
C5 C6 C1 117.4(3) . . ? 
C5 C6 C7 135.6(3) . . ? 
C1 C6 C7 106.9(3) . . ? 
C4 C5 C6 117.6(3) . . ? 
C4 C5 C31 114.1(3) . . ? 
C6 C5 C31 128.2(3) . . ? 
C3 C4 C5 120.7(3) . . ? 
C3 C4 C42 104.7(3) . . ? 
C5 C4 C42 134.6(3) . . ? 
C41 C42 C37 117.2(4) . . ? 
C41 C42 C4 136.3(4) . . ? 
C37 C42 C4 106.4(3) . . ? 
C40 C41 C42 118.6(4) . . ? 
C40 C41 H41 120.7 . . ? 
C42 C41 H41 120.7 . . ? 
C39 C40 C41 122.2(4) . . ? 
C39 C40 H40 118.9 . . ? 
C41 C40 H40 118.9 . . ? 
C38 C39 C40 121.0(4) . . ? 
C38 C39 H39 119.5 . . ? 
C40 C39 H39 119.5 . . ? 
C39 C38 C37 116.1(4) . . ? 
C39 C38 H38 122.0 . . ? 
C37 C38 H38 122.0 . . ? 
C38 C37 O4 124.1(4) . . ? 
C38 C37 C42 124.9(4) . . ? 
O4 C37 C42 111.0(3) . . ? 
C2 C3 O4 123.7(3) . . ? 
C2 C3 C4 123.9(4) . . ? 
O4 C3 C4 112.4(3) . . ? 
C3 C2 C1 115.0(3) . . ? 
C3 C2 H2 122.5 . . ? 
C1 C2 H2 122.5 . . ? 
C2 C1 N1 125.6(3) . . ? 
C2 C1 C6 125.3(3) . . ? 
N1 C1 C6 108.9(3) . . ? 
C26 C25 C30 118.8(3) . . ? 
C26 C25 C12 119.0(3) . . ? 
C30 C25 C12 121.5(3) . . ? 
C25 C26 C27 121.1(4) . . ? 
C25 C26 H26 119.5 . . ? 
C27 C26 H26 119.5 . . ? 
C28 C27 C26 119.7(4) . . ? 
C28 C27 H27 120.1 . . ? 
C26 C27 H27 120.1 . . ? 
C29 C28 C27 119.9(4) . . ? 
C29 C28 H28 120.1 . . ? 
C27 C28 H28 120.1 . . ? 
C28 C29 C30 121.0(4) . . ? 
C28 C29 H29 119.5 . . ? 
C30 C29 H29 119.5 . . ? 
C25 C30 C29 119.6(4) . . ? 
C25 C30 H30 120.2 . . ? 
C29 C30 H30 120.2 . . ? 
C32 C31 C36 119.5(3) . . ? 
C32 C31 C5 118.2(3) . . ? 
C36 C31 C5 121.2(3) . . ? 
C31 C32 C33 120.0(5) . . ? 
C31 C32 H32 120.0 . . ? 
C33 C32 H32 120.0 . . ? 
C34 C33 C32 120.1(5) . . ? 
C34 C33 H33 120.0 . . ? 
C32 C33 H33 120.0 . . ? 
C35 C34 C33 119.8(4) . . ? 
C35 C34 H34 120.1 . . ? 
C33 C34 H34 120.1 . . ? 
C34 C35 C36 120.9(5) . . ? 
C34 C35 H35 119.6 . . ? 
C36 C35 H35 119.6 . . ? 
C35 C36 C31 119.7(4) . . ? 
C35 C36 H36 120.2 . . ? 
C31 C36 H36 120.2 . . ? 
C9A C8A C7A 125.3(3) . . ? 
C9A C8A N1A 124.3(3) . . ? 
C7A C8A N1A 110.2(3) . . ? 
C10A C9A C8A 114.4(3) . . ? 
C10A C9A H9A 122.8 . . ? 
C8A C9A H9A 122.8 . . ? 
C9A C10A O1A 123.3(3) . . ? 
C9A C10A C11A 124.7(3) . . ? 
O1A C10A C11A 112.0(3) . . ? 
C20A C19A O1A 123.7(4) . . ? 
C20A C19A C24A 124.8(4) . . ? 
O1A C19A C24A 111.4(3) . . ? 
C21A C20A C19A 116.3(4) . . ? 
C21A C20A H20A 121.9 . . ? 
C19A C20A H20A 121.9 . . ? 
C20A C21A C22A 121.1(4) . . ? 
C20A C21A H21A 119.4 . . ? 
C22A C21A H21A 119.4 . . ? 
C21A C22A C23A 121.7(4) . . ? 
C21A C22A H22A 119.1 . . ? 
C23A C22A H22A 119.1 . . ? 
C22A C23A C24A 118.7(4) . . ? 
C22A C23A H23A 120.6 . . ? 
C24A C23A H23A 120.6 . . ? 
C23A C24A C19A 117.3(4) . . ? 
C23A C24A C11A 136.5(4) . . ? 
C19A C24A C11A 106.2(3) . . ? 
C12A C11A C10A 120.1(3) . . ? 
C12A C11A C24A 135.1(3) . . ? 
C10A C11A C24A 104.8(3) . . ? 
C11A C12A C7A 117.8(3) . . ? 
C11A C12A C25A 114.0(3) . . ? 
C7A C12A C25A 128.2(3) . . ? 
C12A C7A C8A 117.5(3) . . ? 
C12A C7A C6A 136.0(3) . . ? 
C8A C7A C6A 106.5(3) . . ? 
C5A C6A C1A 117.3(3) . . ? 
C5A C6A C7A 135.7(3) . . ? 
C1A C6A C7A 106.9(3) . . ? 
C4A C5A C6A 118.0(3) . . ? 
C4A C5A C31A 114.8(3) . . ? 
C6A C5A C31A 127.2(3) . . ? 
C3A C4A C5A 120.7(3) . . ? 
C3A C4A C42A 104.9(3) . . ? 
C5A C4A C42A 134.4(3) . . ? 
C37A C42A C41A 117.6(4) . . ? 
C37A C42A C4A 105.8(3) . . ? 
C41A C42A C4A 136.6(4) . . ? 
C40A C41A C42A 118.5(4) . . ? 
C40A C41A H41A 120.7 . . ? 
C42A C41A H41A 120.7 . . ? 
C39A C40A C41A 122.1(4) . . ? 
C39A C40A H40A 118.9 . . ? 
C41A C40A H40A 118.9 . . ? 
C38A C39A C40A 120.6(4) . . ? 
C38A C39A H39A 119.7 . . ? 
C40A C39A H39A 119.7 . . ? 
C39A C38A C37A 116.9(4) . . ? 
C39A C38A H38A 121.5 . . ? 
C37A C38A H38A 121.5 . . ? 
C38A C37A O4A 124.1(4) . . ? 
C38A C37A C42A 124.2(4) . . ? 
O4A C37A C42A 111.6(3) . . ? 
C2A C3A O4A 124.0(4) . . ? 
C2A C3A C4A 123.7(4) . . ? 
O4A C3A C4A 112.3(3) . . ? 
C1A C2A C3A 114.5(4) . . ? 
C1A C2A H2A 122.7 . . ? 
C3A C2A H2A 122.7 . . ? 
C2A C1A C6A 125.8(3) . . ? 
C2A C1A N1A 124.4(3) . . ? 
C6A C1A N1A 109.7(3) . . ? 
C30A C25A C26A 118.3(3) . . ? 
C30A C25A C12A 121.7(3) . . ? 
C26A C25A C12A 119.1(3) . . ? 
C25A C30A C29A 121.1(4) . . ? 
C25A C30A H30A 119.5 . . ? 
C29A C30A H30A 119.5 . . ? 
C28A C29A C30A 119.8(4) . . ? 
C28A C29A H29A 120.1 . . ? 
C30A C29A H29A 120.1 . . ? 
C27A C28A C29A 119.9(4) . . ? 
C27A C28A H28A 120.0 . . ? 
C29A C28A H28A 120.0 . . ? 
C28A C27A C26A 120.3(4) . . ? 
C28A C27A H27A 119.8 . . ? 
C26A C27A H27A 119.8 . . ? 
C27A C26A C25A 120.7(4) . . ? 
C27A C26A H26A 119.7 . . ? 
C25A C26A H26A 119.7 . . ? 
C32A C31A C36A 118.4(4) . . ? 
C32A C31A C5A 119.1(3) . . ? 
C36A C31A C5A 121.8(4) . . ? 
C31A C36A C35A 120.1(5) . . ? 
C31A C36A H36A 120.0 . . ? 
C35A C36A H36A 120.0 . . ? 
C34A C35A C36A 120.7(5) . . ? 
C34A C35A H35A 119.7 . . ? 
C36A C35A H35A 119.7 . . ? 
C33A C34A C35A 119.3(4) . . ? 
C33A C34A H34A 120.3 . . ? 
C35A C34A H34A 120.3 . . ? 
C34A C33A C32A 120.9(5) . . ? 
C34A C33A H33A 119.6 . . ? 
C32A C33A H33A 119.6 . . ? 
C31A C32A C33A 120.7(4) . . ? 
C31A C32A H32A 119.7 . . ? 
C33A C32A H32A 119.7 . . ? 
C18A C13A C14A 120.9(4) . . ? 
C18A C13A S1A 119.9(3) . . ? 
C14A C13A S1A 119.3(3) . . ? 
C17A C18A C13A 119.5(4) . . ? 
C17A C18A H80 120.3 . . ? 
C13A C18A H80 120.3 . . ? 
C16A C17A C18A 120.1(4) . . ? 
C16A C17A H81 119.9 . . ? 
C18A C17A H81 119.9 . . ? 
C15A C16A C17A 120.5(4) . . ? 
C15A C16A H82 119.7 . . ? 
C17A C16A H82 119.7 . . ? 
C16A C15A C14A 121.0(4) . . ? 
C16A C15A H83 119.5 . . ? 
C14A C15A H83 119.5 . . ? 
C15A C14A C13A 118.1(4) . . ? 
C15A C14A H84 121.0 . . ? 
C13A C14A H84 121.0 . . ? 
C8 N1 C1 108.1(3) . . ? 
C8 N1 S1' 123.7(4) . . ? 
C1 N1 S1' 121.9(4) . . ? 
C8 N1 S1 121.2(4) . . ? 
C1 N1 S1 124.0(4) . . ? 
C8A N1A C1A 106.7(3) . . ? 
C8A N1A S1A 120.6(2) . . ? 
C1A N1A S1A 119.4(2) . . ? 
C19 O1 C10 105.8(3) . . ? 
C3 O4 C37 105.5(3) . . ? 
C10A O1A C19A 105.5(3) . . ? 
C3A O4A C37A 105.3(3) . . ? 
O2A S1A O3A 120.16(18) . . ? 
O2A S1A N1A 106.56(17) . . ? 
O3A S1A N1A 106.53(16) . . ? 
O2A S1A C13A 108.62(19) . . ? 
O3A S1A C13A 109.30(19) . . ? 
N1A S1A C13A 104.54(16) . . ? 
O3 S1 O2 122.0(10) . . ? 
O3 S1 N1 106.1(10) . . ? 
O2 S1 N1 106.4(6) . . ? 
O3 S1 C13 108.5(11) . . ? 
O2 S1 C13 107.5(8) . . ? 
N1 S1 C13 105.0(5) . . ? 
C14 C13 C18 120.0 . . ? 
C14 C13 S1 114.3(8) . . ? 
C18 C13 S1 125.6(8) . . ? 
C13 C14 C15 120.0 . . ? 
C13 C14 H14 120.0 . . ? 
C15 C14 H14 120.0 . . ? 
C16 C15 C14 120.0 . . ? 
C16 C15 H15 120.0 . . ? 
C14 C15 H15 120.0 . . ? 
C15 C16 C17 120.0 . . ? 
C15 C16 H16 120.0 . . ? 
C17 C16 H16 120.0 . . ? 
C18 C17 C16 120.0 . . ? 
C18 C17 H17 120.0 . . ? 
C16 C17 H17 120.0 . . ? 
C17 C18 C13 120.0 . . ? 
C17 C18 H18 120.0 . . ? 
C13 C18 H18 120.0 . . ? 
O2' S1' O3' 116.0(16) . . ? 
O2' S1' N1 109.0(11) . . ? 
O3' S1' N1 106.1(18) . . ? 
O2' S1' C13' 113.2(15) . . ? 
O3' S1' C13' 108(2) . . ? 
N1 S1' C13' 103.3(9) . . ? 
C14' C13' C18' 120.0 . . ? 
C14' C13' S1' 132.4(16) . . ? 
C18' C13' S1' 107.5(17) . . ? 
C13' C14' C15' 120.0 . . ? 
C13' C14' H14' 120.0 . . ? 
C15' C14' H14' 120.0 . . ? 
C16' C15' C14' 120.0 . . ? 
C16' C15' H15' 120.0 . . ? 
C14' C15' H15' 120.0 . . ? 
C17' C16' C15' 120.0 . . ? 
C17' C16' H16' 120.0 . . ? 
C15' C16' H16' 120.0 . . ? 
C16' C17' C18' 120.0 . . ? 
C16' C17' H17' 120.0 . . ? 
C18' C17' H17' 120.0 . . ? 
C17' C18' C13' 120.0 . . ? 
C17' C18' H18' 120.0 . . ? 
C13' C18' H18' 120.0 . . ? 
 
loop_ 
 _geom_torsion_atom_site_label_1 
 _geom_torsion_atom_site_label_2 
 _geom_torsion_atom_site_label_3 
 _geom_torsion_atom_site_label_4 
 _geom_torsion 
 _geom_torsion_site_symmetry_1 
 _geom_torsion_site_symmetry_2 
 _geom_torsion_site_symmetry_3 
 _geom_torsion_site_symmetry_4 
 _geom_torsion_publ_flag 
N1 C8 C9 C10 177.4(4) . . . . ? 
C7 C8 C9 C10 0.5(6) . . . . ? 
C8 C9 C10 O1 179.0(4) . . . . ? 
C8 C9 C10 C11 -0.2(6) . . . . ? 
O1 C19 C20 C21 -179.8(4) . . . . ? 
C24 C19 C20 C21 -1.4(7) . . . . ? 
C19 C20 C21 C22 -0.5(7) . . . . ? 
C20 C21 C22 C23 1.2(7) . . . . ? 
C21 C22 C23 C24 -0.2(6) . . . . ? 
C22 C23 C24 C19 -1.5(6) . . . . ? 
C22 C23 C24 C11 178.6(4) . . . . ? 
C20 C19 C24 C23 2.4(6) . . . . ? 
O1 C19 C24 C23 -179.0(3) . . . . ? 
C20 C19 C24 C11 -177.7(4) . . . . ? 
O1 C19 C24 C11 0.9(4) . . . . ? 
C9 C10 C11 C12 -0.1(6) . . . . ? 
O1 C10 C11 C12 -179.4(3) . . . . ? 
C9 C10 C11 C24 178.7(4) . . . . ? 
O1 C10 C11 C24 -0.6(4) . . . . ? 
C23 C24 C11 C10 179.7(5) . . . . ? 
C19 C24 C11 C10 -0.1(4) . . . . ? 
C23 C24 C11 C12 -1.8(8) . . . . ? 
C19 C24 C11 C12 178.3(4) . . . . ? 
C10 C11 C12 C7 0.1(5) . . . . ? 
C24 C11 C12 C7 -178.2(4) . . . . ? 
C10 C11 C12 C25 176.7(3) . . . . ? 
C24 C11 C12 C25 -1.5(6) . . . . ? 
C11 C12 C7 C8 0.2(5) . . . . ? 
C25 C12 C7 C8 -175.9(3) . . . . ? 
C11 C12 C7 C6 -176.2(4) . . . . ? 
C25 C12 C7 C6 7.7(7) . . . . ? 
C9 C8 C7 C12 -0.5(6) . . . . ? 
N1 C8 C7 C12 -177.8(3) . . . . ? 
C9 C8 C7 C6 176.9(4) . . . . ? 
N1 C8 C7 C6 -0.4(4) . . . . ? 
C12 C7 C6 C5 0.7(7) . . . . ? 
C8 C7 C6 C5 -176.0(4) . . . . ? 
C12 C7 C6 C1 177.0(4) . . . . ? 
C8 C7 C6 C1 0.3(4) . . . . ? 
C1 C6 C5 C4 -2.9(5) . . . . ? 
C7 C6 C5 C4 173.2(4) . . . . ? 
C1 C6 C5 C31 174.6(3) . . . . ? 
C7 C6 C5 C31 -9.4(7) . . . . ? 
C6 C5 C4 C3 2.9(5) . . . . ? 
C31 C5 C4 C3 -174.9(3) . . . . ? 
C6 C5 C4 C42 -176.4(4) . . . . ? 
C31 C5 C4 C42 5.8(6) . . . . ? 
C3 C4 C42 C41 -176.4(4) . . . . ? 
C5 C4 C42 C41 3.1(7) . . . . ? 
C3 C4 C42 C37 -0.2(4) . . . . ? 
C5 C4 C42 C37 179.2(4) . . . . ? 
C37 C42 C41 C40 -0.6(5) . . . . ? 
C4 C42 C41 C40 175.3(4) . . . . ? 
C42 C41 C40 C39 0.7(6) . . . . ? 
C41 C40 C39 C38 0.3(7) . . . . ? 
C40 C39 C38 C37 -1.4(6) . . . . ? 
C39 C38 C37 O4 -177.1(4) . . . . ? 
C39 C38 C37 C42 1.7(6) . . . . ? 
C41 C42 C37 C38 -0.7(6) . . . . ? 
C4 C42 C37 C38 -177.7(4) . . . . ? 
C41 C42 C37 O4 178.2(3) . . . . ? 
C4 C42 C37 O4 1.2(4) . . . . ? 
C5 C4 C3 C2 -1.8(6) . . . . ? 
C42 C4 C3 C2 177.8(3) . . . . ? 
C5 C4 C3 O4 179.7(3) . . . . ? 
C42 C4 C3 O4 -0.8(4) . . . . ? 
O4 C3 C2 C1 178.9(3) . . . . ? 
C4 C3 C2 C1 0.5(6) . . . . ? 
C3 C2 C1 N1 -175.0(3) . . . . ? 
C3 C2 C1 C6 -0.5(6) . . . . ? 
C5 C6 C1 C2 1.8(5) . . . . ? 
C7 C6 C1 C2 -175.3(3) . . . . ? 
C5 C6 C1 N1 177.0(3) . . . . ? 
C7 C6 C1 N1 -0.1(4) . . . . ? 
C11 C12 C25 C26 -90.7(4) . . . . ? 
C7 C12 C25 C26 85.6(5) . . . . ? 
C11 C12 C25 C30 79.6(4) . . . . ? 
C7 C12 C25 C30 -104.2(5) . . . . ? 
C30 C25 C26 C27 -0.5(6) . . . . ? 
C12 C25 C26 C27 170.0(4) . . . . ? 
C25 C26 C27 C28 -0.2(7) . . . . ? 
C26 C27 C28 C29 0.6(7) . . . . ? 
C27 C28 C29 C30 -0.4(7) . . . . ? 
C26 C25 C30 C29 0.8(6) . . . . ? 
C12 C25 C30 C29 -169.5(4) . . . . ? 
C28 C29 C30 C25 -0.3(7) . . . . ? 
C4 C5 C31 C32 82.3(4) . . . . ? 
C6 C5 C31 C32 -95.1(5) . . . . ? 
C4 C5 C31 C36 -85.9(4) . . . . ? 
C6 C5 C31 C36 96.7(5) . . . . ? 
C36 C31 C32 C33 -0.6(6) . . . . ? 
C5 C31 C32 C33 -169.0(4) . . . . ? 
C31 C32 C33 C34 0.6(7) . . . . ? 
C32 C33 C34 C35 -1.0(8) . . . . ? 
C33 C34 C35 C36 1.3(8) . . . . ? 
C34 C35 C36 C31 -1.3(7) . . . . ? 
C32 C31 C36 C35 1.0(6) . . . . ? 
C5 C31 C36 C35 169.0(4) . . . . ? 
C7A C8A C9A C10A 5.1(5) . . . . ? 
N1A C8A C9A C10A 179.4(3) . . . . ? 
C8A C9A C10A O1A 177.6(3) . . . . ? 
C8A C9A C10A C11A -1.2(5) . . . . ? 
O1A C19A C20A C21A -178.5(4) . . . . ? 
C24A C19A C20A C21A -0.4(6) . . . . ? 
C19A C20A C21A C22A -0.1(6) . . . . ? 
C20A C21A C22A C23A -0.1(7) . . . . ? 
C21A C22A C23A C24A 0.6(6) . . . . ? 
C22A C23A C24A C19A -0.9(5) . . . . ? 
C22A C23A C24A C11A 178.0(4) . . . . ? 
C20A C19A C24A C23A 0.9(6) . . . . ? 
O1A C19A C24A C23A 179.2(3) . . . . ? 
C20A C19A C24A C11A -178.4(4) . . . . ? 
O1A C19A C24A C11A 0.0(4) . . . . ? 
C9A C10A C11A C12A -1.3(6) . . . . ? 
O1A C10A C11A C12A 179.8(3) . . . . ? 
C9A C10A C11A C24A 176.7(3) . . . . ? 
O1A C10A C11A C24A -2.2(4) . . . . ? 
C23A C24A C11A C12A -0.2(7) . . . . ? 
C19A C24A C11A C12A 178.8(4) . . . . ? 
C23A C24A C11A C10A -177.7(4) . . . . ? 
C19A C24A C11A C10A 1.3(4) . . . . ? 
C10A C11A C12A C7A 0.2(5) . . . . ? 
C24A C11A C12A C7A -177.0(4) . . . . ? 
C10A C11A C12A C25A 178.3(3) . . . . ? 
C24A C11A C12A C25A 1.1(6) . . . . ? 
C11A C12A C7A C8A 3.2(5) . . . . ? 
C25A C12A C7A C8A -174.7(3) . . . . ? 
C11A C12A C7A C6A -175.2(4) . . . . ? 
C25A C12A C7A C6A 6.9(6) . . . . ? 
C9A C8A C7A C12A -6.2(5) . . . . ? 
N1A C8A C7A C12A 178.8(3) . . . . ? 
C9A C8A C7A C6A 172.6(3) . . . . ? 
N1A C8A C7A C6A -2.4(4) . . . . ? 
C12A C7A C6A C5A 3.6(7) . . . . ? 
C8A C7A C6A C5A -174.9(4) . . . . ? 
C12A C7A C6A C1A 179.6(4) . . . . ? 
C8A C7A C6A C1A 1.1(4) . . . . ? 
C1A C6A C5A C4A -1.4(5) . . . . ? 
C7A C6A C5A C4A 174.3(4) . . . . ? 
C1A C6A C5A C31A 177.3(3) . . . . ? 
C7A C6A C5A C31A -7.0(6) . . . . ? 
C6A C5A C4A C3A 1.0(5) . . . . ? 
C31A C5A C4A C3A -177.8(3) . . . . ? 
C6A C5A C4A C42A 179.6(4) . . . . ? 
C31A C5A C4A C42A 0.7(6) . . . . ? 
C3A C4A C42A C37A -0.6(4) . . . . ? 
C5A C4A C42A C37A -179.3(4) . . . . ? 
C3A C4A C42A C41A 178.7(5) . . . . ? 
C5A C4A C42A C41A 0.0(8) . . . . ? 
C37A C42A C41A C40A 0.6(6) . . . . ? 
C4A C42A C41A C40A -178.7(4) . . . . ? 
C42A C41A C40A C39A -0.7(7) . . . . ? 
C41A C40A C39A C38A 0.4(7) . . . . ? 
C40A C39A C38A C37A -0.1(7) . . . . ? 
C39A C38A C37A O4A 178.3(4) . . . . ? 
C39A C38A C37A C42A 0.1(7) . . . . ? 
C41A C42A C37A C38A -0.3(6) . . . . ? 
C4A C42A C37A C38A 179.2(4) . . . . ? 
C41A C42A C37A O4A -178.8(3) . . . . ? 
C4A C42A C37A O4A 0.7(5) . . . . ? 
C5A C4A C3A C2A -0.3(6) . . . . ? 
C42A C4A C3A C2A -179.2(4) . . . . ? 
C5A C4A C3A O4A 179.2(3) . . . . ? 
C42A C4A C3A O4A 0.3(4) . . . . ? 
O4A C3A C2A C1A -179.5(4) . . . . ? 
C4A C3A C2A C1A -0.1(6) . . . . ? 
C3A C2A C1A C6A -0.4(6) . . . . ? 
C3A C2A C1A N1A -176.1(3) . . . . ? 
C5A C6A C1A C2A 1.1(6) . . . . ? 
C7A C6A C1A C2A -175.7(4) . . . . ? 
C5A C6A C1A N1A 177.4(3) . . . . ? 
C7A C6A C1A N1A 0.5(4) . . . . ? 
C11A C12A C25A C30A 81.4(4) . . . . ? 
C7A C12A C25A C30A -100.6(5) . . . . ? 
C11A C12A C25A C26A -87.0(4) . . . . ? 
C7A C12A C25A C26A 91.0(5) . . . . ? 
C26A C25A C30A C29A -0.7(6) . . . . ? 
C12A C25A C30A C29A -169.2(4) . . . . ? 
C25A C30A C29A C28A 0.8(6) . . . . ? 
C30A C29A C28A C27A -0.6(6) . . . . ? 
C29A C28A C27A C26A 0.1(6) . . . . ? 
C28A C27A C26A C25A 0.0(6) . . . . ? 
C30A C25A C26A C27A 0.2(6) . . . . ? 
C12A C25A C26A C27A 169.1(4) . . . . ? 
C4A C5A C31A C32A 87.3(4) . . . . ? 
C6A C5A C31A C32A -91.5(5) . . . . ? 
C4A C5A C31A C36A -82.5(4) . . . . ? 
C6A C5A C31A C36A 98.7(5) . . . . ? 
C32A C31A C36A C35A -0.2(6) . . . . ? 
C5A C31A C36A C35A 169.7(4) . . . . ? 
C31A C36A C35A C34A -0.6(7) . . . . ? 
C36A C35A C34A C33A 1.5(8) . . . . ? 
C35A C34A C33A C32A -1.5(8) . . . . ? 
C36A C31A C32A C33A 0.1(6) . . . . ? 
C5A C31A C32A C33A -170.0(4) . . . . ? 
C34A C33A C32A C31A 0.7(7) . . . . ? 
C14A C13A C18A C17A -0.9(7) . . . . ? 
S1A C13A C18A C17A 178.5(4) . . . . ? 
C13A C18A C17A C16A 0.5(7) . . . . ? 
C18A C17A C16A C15A 0.2(8) . . . . ? 
C17A C16A C15A C14A -0.5(8) . . . . ? 
C16A C15A C14A C13A 0.0(7) . . . . ? 
C18A C13A C14A C15A 0.6(6) . . . . ? 
S1A C13A C14A C15A -178.7(3) . . . . ? 
C9 C8 N1 C1 -176.9(4) . . . . ? 
C7 C8 N1 C1 0.4(4) . . . . ? 
C9 C8 N1 S1' 30.8(6) . . . . ? 
C7 C8 N1 S1' -152.0(4) . . . . ? 
C9 C8 N1 S1 30.8(6) . . . . ? 
C7 C8 N1 S1 -151.9(4) . . . . ? 
C2 C1 N1 C8 175.0(4) . . . . ? 
C6 C1 N1 C8 -0.2(4) . . . . ? 
C2 C1 N1 S1' -32.0(6) . . . . ? 
C6 C1 N1 S1' 152.7(4) . . . . ? 
C2 C1 N1 S1 -33.6(6) . . . . ? 
C6 C1 N1 S1 151.1(4) . . . . ? 
C9A C8A N1A C1A -172.4(3) . . . . ? 
C7A C8A N1A C1A 2.7(4) . . . . ? 
C9A C8A N1A S1A 47.0(4) . . . . ? 
C7A C8A N1A S1A -137.9(3) . . . . ? 
C2A C1A N1A C8A 174.4(4) . . . . ? 
C6A C1A N1A C8A -2.0(4) . . . . ? 
C2A C1A N1A S1A -44.5(5) . . . . ? 
C6A C1A N1A S1A 139.2(3) . . . . ? 
C20 C19 O1 C10 177.3(4) . . . . ? 
C24 C19 O1 C10 -1.2(4) . . . . ? 
C9 C10 O1 C19 -178.2(4) . . . . ? 
C11 C10 O1 C19 1.2(4) . . . . ? 
C2 C3 O4 C37 -177.0(4) . . . . ? 
C4 C3 O4 C37 1.5(4) . . . . ? 
C38 C37 O4 C3 177.2(4) . . . . ? 
C42 C37 O4 C3 -1.7(4) . . . . ? 
C9A C10A O1A C19A -176.7(3) . . . . ? 
C11A C10A O1A C19A 2.2(4) . . . . ? 
C20A C19A O1A C10A 177.1(3) . . . . ? 
C24A C19A O1A C10A -1.3(4) . . . . ? 
C2A C3A O4A C37A 179.6(4) . . . . ? 
C4A C3A O4A C37A 0.1(4) . . . . ? 
C38A C37A O4A C3A -179.0(4) . . . . ? 
C42A C37A O4A C3A -0.6(5) . . . . ? 
C8A N1A S1A O2A -169.6(3) . . . . ? 
C1A N1A S1A O2A 54.7(3) . . . . ? 
C8A N1A S1A O3A -40.1(3) . . . . ? 
C1A N1A S1A O3A -175.9(3) . . . . ? 
C8A N1A S1A C13A 75.5(3) . . . . ? 
C1A N1A S1A C13A -60.2(3) . . . . ? 
C18A C13A S1A O2A 172.0(3) . . . . ? 
C14A C13A S1A O2A -8.6(4) . . . . ? 
C18A C13A S1A O3A 39.2(4) . . . . ? 
C14A C13A S1A O3A -141.4(3) . . . . ? 
C18A C13A S1A N1A -74.5(4) . . . . ? 
C14A C13A S1A N1A 104.9(3) . . . . ? 
C8 N1 S1 O3 -44.3(11) . . . . ? 
C1 N1 S1 O3 167.9(10) . . . . ? 
S1' N1 S1 O3 135(12) . . . . ? 
C8 N1 S1 O2 -175.6(7) . . . . ? 
C1 N1 S1 O2 36.6(8) . . . . ? 
S1' N1 S1 O2 4(11) . . . . ? 
C8 N1 S1 C13 70.6(6) . . . . ? 
C1 N1 S1 C13 -77.2(7) . . . . ? 
S1' N1 S1 C13 -110(11) . . . . ? 
O3 S1 C13 C14 11.6(13) . . . . ? 
O2 S1 C13 C14 145.3(8) . . . . ? 
N1 S1 C13 C14 -101.6(9) . . . . ? 
O3 S1 C13 C18 -172.0(13) . . . . ? 
O2 S1 C13 C18 -38.2(10) . . . . ? 
N1 S1 C13 C18 74.8(11) . . . . ? 
C18 C13 C14 C15 0.0 . . . . ? 
S1 C13 C14 C15 176.7(7) . . . . ? 
C13 C14 C15 C16 0.0 . . . . ? 
C14 C15 C16 C17 0.0 . . . . ? 
C15 C16 C17 C18 0.0 . . . . ? 
C16 C17 C18 C13 0.0 . . . . ? 
C14 C13 C18 C17 0.0 . . . . ? 
S1 C13 C18 C17 -176.3(8) . . . . ? 
C8 N1 S1' O2' -177.3(12) . . . . ? 
C1 N1 S1' O2' 33.9(14) . . . . ? 
S1 N1 S1' O2' -178(100) . . . . ? 
C8 N1 S1' O3' -51.8(17) . . . . ? 
C1 N1 S1' O3' 159.5(17) . . . . ? 
S1 N1 S1' O3' -53(11) . . . . ? 
C8 N1 S1' C13' 62.0(11) . . . . ? 
C1 N1 S1' C13' -86.7(11) . . . . ? 
S1 N1 S1' C13' 61(11) . . . . ? 
O2' S1' C13' C14' 162(2) . . . . ? 
O3' S1' C13' C14' 32(3) . . . . ? 
N1 S1' C13' C14' -80(2) . . . . ? 
O2' S1' C13' C18' -22.0(18) . . . . ? 
O3' S1' C13' C18' -152(2) . . . . ? 
N1 S1' C13' C18' 95.8(14) . . . . ? 
C18' C13' C14' C15' 0.0 . . . . ? 
S1' C13' C14' C15' 175(2) . . . . ? 
C13' C14' C15' C16' 0.0 . . . . ? 
C14' C15' C16' C17' 0.0 . . . . ? 
C15' C16' C17' C18' 0.0 . . . . ? 
C16' C17' C18' C13' 0.0 . . . . ? 
C14' C13' C18' C17' 0.0 . . . . ? 
S1' C13' C18' C17' -176.3(15) . . . . ? 
 
_diffrn_measured_fraction_theta_max    0.998 
_diffrn_reflns_theta_full              24.96 
_diffrn_measured_fraction_theta_full   0.998 
_refine_diff_density_max    0.309 
_refine_diff_density_min   -0.334 
_refine_diff_density_rms    0.052 
